# Supplementary material for: Prediction of Autism Risk From Family Medical History Data Using Machine Learning: A National Cohort Study From Denmark
Source: PubMed Central journal article supplement — Biol Psychiatry Glob Open Sci. 2021 May 5;1(2):156–64. doi: 10.1016/j.bpsgos.2021.04.007 (PMC9616292; doi:10.1016/j.bpsgos.2021.04.007), 2021-05-05

# Prediction of Autism Risk From Family Medical History Data Using Machine Learning: A National Cohort Study From Denmark

## *Supplemental Information*

### Contents

**Table S1.** Disorders and corresponding ICD 8 and 10-codes

**Table S2.** Detailed analytic description

**Table S3.** Included candidate morbidity indicators by family member type after initial removal of 83 indicators due to lower than 40 exposed ASD cases

**Table S4.** 10-fold cross-validated performance for each candidate model with percent (%) difference to base model

**Table S5.** Test sample performance fit with absolute and percentage (%) differences to parental psychiatric history

**Table S6.** Performance for the machine learning algorithm with the count indicators for each candidate model with percent (%) difference to base model

**Table S7.** Levels for the Top 41 FMRS

**Table S8.** Adjusted\* Odds Ratios (OR) with with 95%CI for the FMRS based on all candidate indicators, the top 21 and the top 3, respectively

**Table S9.** Adjusted\* Odds Ratios (OR) with 95%CI for the FMRS restricting the study population to i) only children, ii) complete linkages, iii) incomplete linkages, iv) test subsample

**Table S10.** Adjusted Odds Ratios (OR) with with 95%CI for the FMRS additionally adjusting for the number of aunts and uncles, cousins, siblings and grandparents

**Figure S1.** Illustration of linkages to family members

**Figure S2.** Prevalence and percent (%) for each morbidity indicator

**Figure S3.** Percent (%) for each morbidity indicator by ASD/no ASD

**Figure S4.** Importance ranking of 30 most important predictors by Random Forest and Extreme Gradient Boost

**Figure S5.** Illustration of performance measures on area-under-the-curve (AUC), F-score and Kappa for all morbidity indicators, top 41, top 21, top 3, respectively

**Figure S6.** Illustration of performance measures depending on the sex of the cohort member

**Figure S7.** Importance ranking of 30 most important predictors by Random Forest and Extreme Gradient Boost for men (A and C) and women (B and D), respectively

**Figure S8.** Smoothed density plot stratified by ASD of FMRS scores based on all 353 indicators, the top 41, the top 21 and the top 3.

| Table S1. Disorders and corresponding ICD 8 and 10-codes    |                                                 |                                                      |                                        |                                                            |                                                                                |                                                                |                                                      |                  |                     |                              |                                                                                                                 |                                   |                              |                      |                           |                                            |                                            |    |
|-------------------------------------------------------------|-------------------------------------------------|------------------------------------------------------|----------------------------------------|------------------------------------------------------------|--------------------------------------------------------------------------------|----------------------------------------------------------------|------------------------------------------------------|------------------|---------------------|------------------------------|-----------------------------------------------------------------------------------------------------------------|-----------------------------------|------------------------------|----------------------|---------------------------|--------------------------------------------|--------------------------------------------|----|
| Diagnosis                                                   | Mental                                          |                                                      | Diagnosis                              | Cardiometabolic                                            |                                                                                | Diagnosis                                                      | Neurologic                                           |                  | Birth defect        |                              | Diagnosis                                                                                                       | Autoimmune                        |                              | Diagnosis            | Other                     |                                            |                                            |    |
|                                                             | 8                                               | 10                                                   |                                        | 8                                                          | 10                                                                             |                                                                | 8                                                    | 10               | 8                   | 10                           |                                                                                                                 | 8                                 | 10                           |                      | 8 & 9                     | 10                                         | 8 & 9                                      | 10 |
|                                                             |                                                 |                                                      |                                        |                                                            |                                                                                |                                                                |                                                      |                  |                     |                              |                                                                                                                 |                                   |                              |                      |                           |                                            |                                            |    |
| ASD                                                         | 299.00-299.03                                   | F84.0, F84.1, F84.5<br>F84.8, F84.9                  | Any diabetes<br>but type 1<br>diabetes | 250, 761.1                                                 | E11-E14, G59.0- G63.2,<br>H28.0, H36.0, M14.2,<br>N08.3, O24.1-O24.4,<br>O24.9 | Systemic<br>atrophies                                          | 331.09, 332<br>348.09, 348.20,<br>348.29, 348.99     | G10-G14          | CNS                 | 740-743                      | G00-Q07                                                                                                         | Thyrototoxicosis                  | 242.00                       | E05.0                | Asthma                    | 493.00, 793.01,<br>493.09                  | J45, J46                                   |    |
| Psychoactive<br>substance use                               | 291, 303, 304                                   | F10-F19                                              | Type 1<br>diabetes                     | 249                                                        | E10, O24.0                                                                     | Extrapyramid                                                   | 342                                                  | G20-G26          | Eye                 | 744                          | Q10-Q15                                                                                                         | Thyroiditis                       | 245.03                       | E06.3                | Allergies                 | 493.02, 507,<br>691.00, 999.49,<br>708.09, | J45.0, J30,<br>L20, T78.0-<br>T78.4, H10.1 |    |
| Schizophrenia                                               | 295, 297, 298                                   | F20-F29                                              | Obesity                                | 277, 277.99, 278                                           | E66, O99.21, Z68.2-<br>Z68.4                                                   | Other<br>degenerative                                          |                                                      | G30-G32          | Ear                 | 745                          | Q16-Q18                                                                                                         | Pri<br>adrenocortical             | 255.1                        | E27.1                |                           |                                            |                                            |    |
| Bipolar disorder                                            | 296.19,<br>296.39, 298.19                       | F30-F31                                              | Hypertension                           | 400-404, 760.2,<br>637.0, 637.1,<br>637.9, 762.1,<br>762.2 | I10-I15, O10, O11, O13-<br>O16                                                 | Inflammatory of<br>CNS                                         | 320-324                                              | G00-G09          | Heart               | 746, 747                     | Q20-Q28                                                                                                         | Rheumatoid<br>arthritis           | 712.19,<br>712.29,<br>712.59 | M05,<br>M06          |                           |                                            |                                            |    |
| Depression                                                  | 296.09,<br>296.29,<br>298.09, 300.49            | F32-F33                                              |                                        |                                                            |                                                                                | Demyelinating of<br>CNS                                        | 340, 341.01                                          | G35-G37          | Respiratory         | 748                          | Q30-Q34                                                                                                         | Juvenile arthritis                | 712.09                       | M08                  |                           |                                            |                                            |    |
| Neurotic/stress<br>disorder not OCD                         | 300 (excl<br>300.9), 305                        | F40, F41, F43-F48                                    |                                        |                                                            |                                                                                | Episodic but not<br>Epilepsy,<br>migraine or<br>sleep disorder | 347.00, 347.01,<br>347.09                            | G42, G44,<br>G46 | Lip                 | 749                          | Q35-Q37                                                                                                         | Dermatopolymyo<br>sitis           | 716                          | M33                  |                           |                                            |                                            |    |
| OCD                                                         | 300.3                                           | F42.0, F42.1, F42.2                                  |                                        |                                                            |                                                                                | Migraine                                                       | 346                                                  | G43              | Digestive           | 750, 751                     | Q38-Q45                                                                                                         | Polymyalgia                       |                              |                      |                           |                                            |                                            |    |
| Behavioral<br>syndrome -<br>physiological<br>(not anorexia) | 306.49,<br>306.58, 306.59                       | F50-F59 (excl F50.0)                                 |                                        |                                                            |                                                                                | Sleep disorders                                                |                                                      | G47              | Genital             | 752                          | Q50-Q56                                                                                                         | Scleroderma                       | 734.0                        |                      | M34<br>(excl:<br>M34.2)   |                                            |                                            |    |
| Anorexia nervosa                                            | 306.50                                          | F50.0                                                |                                        |                                                            |                                                                                | Nerve disorder<br>not<br>polyneuropath                         | 350-358 (excl:354)                                   | G50-G59          | Urinary tract       | 753                          | Q60-Q64                                                                                                         | Lupus erythema                    | 734.19                       |                      | M32.1,<br>M32.8,<br>M32.9 |                                            |                                            |    |
| Adult personality<br>disorder                               | 301,302                                         | F60-F69                                              |                                        |                                                            |                                                                                | Polyneuropath                                                  | 354                                                  | G60-G64          | Musculoskel<br>etal | 754-756                      | Q65-Q79                                                                                                         | Sjogren                           | 734.90                       | M350                 |                           |                                            |                                            |    |
| Intellectual<br>disability                                  | 310-315                                         | F70-F79                                              |                                        |                                                            |                                                                                | Myoneural                                                      | 330, 733.09                                          | G70-G73          | Skin                | 757                          | Q80-Q84                                                                                                         | Ankylos spondil.                  | 712.49                       | M45.9                |                           |                                            |                                            |    |
| Psychological<br>dev. disorder -<br>not ASD                 | 306.10,<br>306.11,<br>306.12,<br>306.18, 306.19 | F80-89 (Ext:<br>F84.0,F48.1, F84.5,<br>F84.8, F84.9) |                                        |                                                            |                                                                                | Cerebral palsy                                                 | 343                                                  | G80-G83          | Other               | 758, 759                     | Q85-Q99 (Excl:Q85.0,<br>Q85.1, Q87.1, Q87.8,<br>Q90,Q93.5, Q93.8, Q98.0,<br>Q98.1,Q98.2,Q98.3, Q98.4,<br>Q99.2) | Celiac not irritabl<br>bowel synd | 269.00                       | K90.0                |                           |                                            |                                            |    |
| Emotional not<br>ADHD or Tic                                | 30609, 30679,<br>30689, 308                     | DF91-DF98 (Ext:<br>DF95.1, 952, 988)                 |                                        |                                                            |                                                                                | Other neurologic                                               | 347.93, 347.94,<br>347.95, 349.00,<br>349.01, 349.09 | G90-G99          | ASD specific        | 759.83,<br>759.30,<br>759.51 | D82.1, Q71.0, Q85.0, Q85.1,<br>Q87.1, Q87.8, Q90, Q93.5,<br>Q93.8, Q98.0, Q98.1,<br>Q98.2, Q98.3, Q98.4, Q99.2  | Irritable bowel<br>syndrome       | 564.19                       | K58                  |                           |                                            |                                            |    |
| ADHD                                                        |                                                 | F90, F98.8                                           |                                        |                                                            |                                                                                | Epilepsy                                                       | 345                                                  | G40, G41         |                     |                              |                                                                                                                 | Crohn                             | 563.01                       | K50                  |                           |                                            |                                            |    |
| Tic disorder                                                | 30629                                           | F95.1, F95.2                                         |                                        |                                                            |                                                                                |                                                                |                                                      |                  |                     |                              |                                                                                                                 | Ulcerative colitis                | 563.19                       | K51                  |                           |                                            |                                            |    |
| Mental-<br>unspecified                                      |                                                 | F99                                                  |                                        |                                                            |                                                                                |                                                                |                                                      |                  |                     |                              |                                                                                                                 | Pernicious anem                   | 281.0                        | D51.0                |                           |                                            |                                            |    |
|                                                             |                                                 |                                                      |                                        |                                                            |                                                                                |                                                                |                                                      |                  |                     |                              |                                                                                                                 | Hemolytic anem                    | 283.90,<br>283.91            | D59.1                |                           |                                            |                                            |    |
|                                                             |                                                 |                                                      |                                        |                                                            |                                                                                |                                                                |                                                      |                  |                     |                              |                                                                                                                 | Purpura                           | 287.31,<br>287.39            | D69.3                |                           |                                            |                                            |    |
|                                                             |                                                 |                                                      |                                        |                                                            |                                                                                |                                                                |                                                      |                  |                     |                              |                                                                                                                 | Multiple sclerosis                | 340                          | G35                  |                           |                                            |                                            |    |
|                                                             |                                                 |                                                      |                                        |                                                            |                                                                                |                                                                |                                                      |                  |                     |                              |                                                                                                                 | Guillain-Bar                      | 354                          | G61.0                |                           |                                            |                                            |    |
|                                                             |                                                 |                                                      |                                        |                                                            |                                                                                |                                                                |                                                      |                  |                     |                              |                                                                                                                 | Myasthen grav.                    | 733.09                       | G70.0                |                           |                                            |                                            |    |
|                                                             |                                                 |                                                      |                                        |                                                            |                                                                                |                                                                |                                                      |                  |                     |                              |                                                                                                                 | Psoriasis                         | 696.09,<br>696.10,<br>696.19 | L40 (excl:<br>L40.4) |                           |                                            |                                            |    |
|                                                             |                                                 |                                                      |                                        |                                                            |                                                                                |                                                                |                                                      |                  |                     |                              |                                                                                                                 | Alopecia areata                   | 704.00                       | L63                  |                           |                                            |                                            |    |
|                                                             |                                                 |                                                      |                                        |                                                            |                                                                                |                                                                |                                                      |                  |                     |                              |                                                                                                                 | Vitiligo                          | 709.01                       | L80.9                |                           |                                            |                                            |    |

The disorders should be mutually exclusive meaning that no ICD-codes are used more than one time to create a disorder

**Table S2. Detailed analytic description**

| Stage                       | Stage 1                                                                                                                                                                                                                                                         | Stage 2                                                                                                                                                                                                                                                                                                                                                                                                                                                                                                                                                                                                                   | Stage 3                                                                                                                                                                                                                                                                                                                                                                                                                                                                                                                                                                                                                                                                                                                                                                                                                                                                                                                                                                                                                                                                                                                                                                                                                                                       | Stage 4                                                                                                                                                                                                                                                                                                                                                                                                                                                                                                                                                                                                                                                                                                                                                                                                                                                                                                                                                                                                                                                                                                                                                                                                                      | Stage 5                                                                                                                                                                                                                                      | Stage 6                                                                                                                                                                                                                                                                                                                                                                                                                                                                                                                                                                                                                                                                                                                                                               |
|-----------------------------|-----------------------------------------------------------------------------------------------------------------------------------------------------------------------------------------------------------------------------------------------------------------|---------------------------------------------------------------------------------------------------------------------------------------------------------------------------------------------------------------------------------------------------------------------------------------------------------------------------------------------------------------------------------------------------------------------------------------------------------------------------------------------------------------------------------------------------------------------------------------------------------------------------|---------------------------------------------------------------------------------------------------------------------------------------------------------------------------------------------------------------------------------------------------------------------------------------------------------------------------------------------------------------------------------------------------------------------------------------------------------------------------------------------------------------------------------------------------------------------------------------------------------------------------------------------------------------------------------------------------------------------------------------------------------------------------------------------------------------------------------------------------------------------------------------------------------------------------------------------------------------------------------------------------------------------------------------------------------------------------------------------------------------------------------------------------------------------------------------------------------------------------------------------------------------|------------------------------------------------------------------------------------------------------------------------------------------------------------------------------------------------------------------------------------------------------------------------------------------------------------------------------------------------------------------------------------------------------------------------------------------------------------------------------------------------------------------------------------------------------------------------------------------------------------------------------------------------------------------------------------------------------------------------------------------------------------------------------------------------------------------------------------------------------------------------------------------------------------------------------------------------------------------------------------------------------------------------------------------------------------------------------------------------------------------------------------------------------------------------------------------------------------------------------|----------------------------------------------------------------------------------------------------------------------------------------------------------------------------------------------------------------------------------------------|-----------------------------------------------------------------------------------------------------------------------------------------------------------------------------------------------------------------------------------------------------------------------------------------------------------------------------------------------------------------------------------------------------------------------------------------------------------------------------------------------------------------------------------------------------------------------------------------------------------------------------------------------------------------------------------------------------------------------------------------------------------------------|
| Phase                       | Development                                                                                                                                                                                                                                                     | Development                                                                                                                                                                                                                                                                                                                                                                                                                                                                                                                                                                                                               | Development                                                                                                                                                                                                                                                                                                                                                                                                                                                                                                                                                                                                                                                                                                                                                                                                                                                                                                                                                                                                                                                                                                                                                                                                                                                   | Development                                                                                                                                                                                                                                                                                                                                                                                                                                                                                                                                                                                                                                                                                                                                                                                                                                                                                                                                                                                                                                                                                                                                                                                                                  | Development                                                                                                                                                                                                                                  | Deployment                                                                                                                                                                                                                                                                                                                                                                                                                                                                                                                                                                                                                                                                                                                                                            |
| Purpose                     | Data partitioning                                                                                                                                                                                                                                               | Tuning                                                                                                                                                                                                                                                                                                                                                                                                                                                                                                                                                                                                                    | Validation and Retraining                                                                                                                                                                                                                                                                                                                                                                                                                                                                                                                                                                                                                                                                                                                                                                                                                                                                                                                                                                                                                                                                                                                                                                                                                                     | Replicate stage 2-3 for different sets of candidate morbidity indicators                                                                                                                                                                                                                                                                                                                                                                                                                                                                                                                                                                                                                                                                                                                                                                                                                                                                                                                                                                                                                                                                                                                                                     | Out-of-sample testing                                                                                                                                                                                                                        | Application of the FMRS                                                                                                                                                                                                                                                                                                                                                                                                                                                                                                                                                                                                                                                                                                                                               |
| Data source                 | Entire study cohort                                                                                                                                                                                                                                             | Training sub-sample                                                                                                                                                                                                                                                                                                                                                                                                                                                                                                                                                                                                       | Training sub-sample                                                                                                                                                                                                                                                                                                                                                                                                                                                                                                                                                                                                                                                                                                                                                                                                                                                                                                                                                                                                                                                                                                                                                                                                                                           | Training sub-sample                                                                                                                                                                                                                                                                                                                                                                                                                                                                                                                                                                                                                                                                                                                                                                                                                                                                                                                                                                                                                                                                                                                                                                                                          | Test sub-sample                                                                                                                                                                                                                              | Entire study cohort                                                                                                                                                                                                                                                                                                                                                                                                                                                                                                                                                                                                                                                                                                                                                   |
| <b>Description of stage</b> | Setting a seed (ensuring that one can replicate the random stochastic process) we divided the study cohort into a test and training sub-sample. 80% of the study cohort were randomly partitioned into the training sub-sample and 20% into the test sub-sample | We tested 10 different algorithms. Each of these were tuned individually selecting the optimal parameters based on which combinations of different tuning parameters provided the highest F-measure score. For each algorithm, we first used a random search to locate the optimal parameter space. We then used a grid search around that specific parameter space to more precisely identify the optimal parameter value. Below are listed each model with an indication of the parameters that were tuned for each of them. All random grid searches were evaluated using the same seed (the same stochastic process). | Using the initial tuned parameters, we calculated performance measures for the algorithms and started to compare models. As with the tuning stage, we used the same seed. As described in the main paper, an important issue in this study was the extremely imbalanced class distribution (a ratio of 1 case to 63 non-cases). The initial tuning and performance reflected this and we experimented with both upscaling the cases, downscaling the non-cases and mixing the two approaches. Downscaling the non-cases were vastly superior to the other two approaches in terms of with computational speed and model performance, thus - with a downscaling ratio of 1 to 1 (randomly selected from the non-cases), we again tuned each algorithm parameter listed in stage 2, with first a random search and then a grid search using the same seed for the downscaling across the algorithms to ensure comparability. Three super-learners incorporating the different algorithms in different ways were then estimated using the parameter values identified using the same downscaling process. The average performance measure across the 10-fold validation were than computed, also extracting the standard deviation across the 10 different runs. | Stage 2 and 3 were replicated for different sets of candidate morbidity indicators. First, a model based on 353 candidate indicators were trained. As described in the paper we then calculated the variable importance using two different algorithms: Random Forest and Extreme Gradient Boost. Each algorithm calculated the importance for each of the 353 variables measured by the total amount the Gini index is decreased by splits over each morbidity indicator, averaged over all trees. The resulted in two importance ranking (which were widely similar as shown in Figure SX). As it is not clear which algorithm were superior in terms of estimating the variable importance we choose to include a variable in the best performing variable set if they were either included in the top based on estimations on either the Random Forest or the Gradient Boost algorithm. We cycled through 3 different restrictions of included variables. First we restricted the included variables to those that were either among the top 30 variables in either the RF or the EGB (41 variables were in either one or the other), then among the 15 best performing (21 variables were included) or among the top 3. | Having chosen the best performing algorithm in stage 4, we now applied this algorithm to the test subsample and calculated the F-score, area under the curve (AUC), sensitivity, predictive positive value, deviance, kappa and specificity. | For each study participant a family morbidity risk score (FMRS) was calculated using the estimated predicted probability from the best performing algorithm. This score was then applied to the whole study population. We calculated the distribution of the FMRS and compared the similarity of the distribution of ASD cases compared to non-cases. We then used logistic regression with ASD as the outcome estimated unadjusted and adjusted associations with the FMRS. We compared the adjusted estimates to other representations of family morbidity history: parental psychiatric disorders yes/no and sibling ASD history yes/no. Lastly, we assessed potential interaction between the FMRS and gender, birth weight and parental socioeconomic position. |
|                             |                                                                                                                                                                                                                                                                 |                                                                                                                                                                                                                                                                                                                                                                                                                                                                                                                                                                                                                           |                                                                                                                                                                                                                                                                                                                                                                                                                                                                                                                                                                                                                                                                                                                                                                                                                                                                                                                                                                                                                                                                                                                                                                                                                                                               | We also replicated stage 2 and 3 for a number of sensitivity analyses. First running the main analyses separate for men and women and then included the candidate indicators as counting the number of times, the diagnosis in question had occurred within each family member type.                                                                                                                                                                                                                                                                                                                                                                                                                                                                                                                                                                                                                                                                                                                                                                                                                                                                                                                                         |                                                                                                                                                                                                                                              |                                                                                                                                                                                                                                                                                                                                                                                                                                                                                                                                                                                                                                                                                                                                                                       |

**Table S3. Included candidate morbidity indicators by family member type after initial removal of 83 indicators due to lower than 40 exposed ASD cases.**

| Diagnosis                                             | Grandparents | Aunts/uncles | Mother | Father | Cousin | Sibling |                        |
|-------------------------------------------------------|--------------|--------------|--------|--------|--------|---------|------------------------|
| ASD                                                   |              | x            | x      | x      | x      | x       | <b>Mental</b>          |
| Psychoactive substance use                            | x            | x            | x      | x      | x      | x       |                        |
| Schizophrenia                                         | x            | x            | x      | x      | x      | x       |                        |
| Bipolar disorder                                      | x            | x            | x      | x      | x      | x       |                        |
| Depression                                            | x            | x            | x      | x      | x      | x       |                        |
| Neurotic/stress disorder not OCD                      | x            | x            | x      | x      | x      | x       |                        |
| OCD                                                   | x            | x            | x      | x      | x      | x       |                        |
| Behavioral syndrome - physiological (not anorexia)    | x            | x            | x      | x      | x      | x       |                        |
| Anorexia nervosa                                      |              | x            | x      |        | x      | x       |                        |
| Adult personality disorder                            | x            | x            | x      | x      | x      | x       |                        |
| Intellectual disability                               | x            | x            | x      | x      | x      | x       |                        |
| Psychological dev. disorder - not ASD                 |              | x            | x      |        | x      | x       |                        |
| Emotional not ADHD or Tic                             | x            | x            | x      | x      | x      | x       |                        |
| ADHD                                                  |              | x            | x      | x      | x      | x       |                        |
| Tic disorder                                          |              |              |        |        | x      | x       |                        |
| Mental-unspecified                                    | x            | x            | x      | x      | x      | x       |                        |
| Any diabetes but type 1 diabetes                      | x            | x            | x      | x      | x      | x       | <b>Cardiometabolic</b> |
| Type 1 diabetes                                       | x            | x            | x      | x      | x      | x       |                        |
| Obesity                                               | x            | x            | x      | x      | x      | x       |                        |
| Hypertension                                          | x            | x            | x      | x      | x      | x       |                        |
| Systemic atrophies                                    | x            |              |        |        |        |         | <b>Neurologic</b>      |
| Extrapyramid                                          | x            | x            | x      | x      | x      | x       |                        |
| Other degenerative                                    | x            | x            |        |        |        |         |                        |
| Inflammatory of CNS                                   | x            | x            | x      | x      | x      | x       |                        |
| Demyelinating of CNS                                  | x            | x            | x      | x      |        |         |                        |
| Episodic but not Epilepsy, migraine or sleep disorder | x            | x            | x      | x      | x      | x       |                        |
| Migraine                                              | x            | x            | x      | x      | x      |         |                        |
| Sleep disorders                                       | x            | x            | x      | x      | x      | x       |                        |
| Nerve disorder not polyneuropath                      | x            | x            | x      | x      | x      |         |                        |
| Polyneuropath                                         | x            | x            | x      | x      | x      |         |                        |
| Myoneural                                             | x            | x            | x      | x      | x      | x       |                        |
| Cerebral palsy                                        | x            | x            | x      | x      | x      |         |                        |
| Other neurologic                                      |              |              |        |        |        |         |                        |
| Epilepsy                                              | x            | x            | x      | x      | x      | x       |                        |

|                                |   |   |   |   |   |   |              |
|--------------------------------|---|---|---|---|---|---|--------------|
| CNS                            | X | X | X |   | X |   | Birth defect |
| Eye                            | X | X | X | X | X | X |              |
| Ear                            | X | X | X | X | X | X |              |
| Heart                          | X | X | X | X | X | X |              |
| Respiratory                    | X | X | X | X | X | X |              |
| Lip                            |   | X | X |   | X | X |              |
| Digestive                      | X | X | X | X | X | X |              |
| Genital                        | X | X | X | X | X | X |              |
| Urinary tract                  | X | X | X | X | X | X |              |
| Musculoskeletal                | X | X | X | X | X |   |              |
| Skin                           | X | X | X | X | X | X |              |
| Other                          | X | X | X |   | X | X |              |
| ASD specific                   | X | X | X |   | X | X |              |
| Thyrotoxicosis                 | X | X | X | X | X |   | Autoimmune   |
| Thyroiditis                    | X | X | X |   | X |   |              |
| Pri adrenocortical             | X |   |   |   |   |   |              |
| Rheumatoid arthritis           | X | X | X | X | X | X |              |
| Juvenile arthritis             |   | X |   |   | X |   |              |
| Dermatopolymyositis            | X |   |   |   |   |   |              |
| Polymyalgia                    | X | X |   |   |   |   |              |
| Scleroderma                    | X | X |   |   |   |   |              |
| Lupus erythema                 | X | X | X |   | X |   |              |
| Sjogren                        | X | X | X |   |   |   |              |
| Ankylos spondil.               | X | X | X | X | X |   |              |
| Celiac not irritabl bowel synd | X | X | X |   | X | X |              |
| Irritable bowel syndrome       | X | X | X | X | X | X |              |
| Crohn                          | X | X | X | X | X | X |              |
| Ulcerative colitis             | X | X | X | X | X | X |              |
| Pernicious anem                | X |   |   |   |   |   |              |
| Hemolytic anem                 | X |   |   |   |   |   |              |
| Purpura                        | X | X |   |   |   |   |              |
| Multple sclerosis              | X | X | X | X | X |   |              |
| Guillain-Bar                   | X | X |   |   |   |   |              |
| Myasthen grav.                 | X |   |   |   |   |   |              |
| Psoriasis                      | X | X | X | X | X | X |              |
| Alopecia areata                | X | X |   |   | X |   |              |
| Vitiligo                       |   |   |   |   |   |   |              |
| Asthma                         | X | X | X | X | X | X | Other        |
| Allergies                      | X | X | X | X | X | X |              |



**Table S5. Test sample performance fit with absolute and percentage (%) differences to parental psychiatric history**

|          | <i>Parental</i> | <b>Top 41</b> | <b>Absolut</b> | <b>Percentage</b> |
|----------|-----------------|---------------|----------------|-------------------|
| F-score  | <i>0,048</i>    | 0,054         | 0,006          | 12%               |
| Kappa    | <i>0,020</i>    | 0,025         | 0,005          | 27%               |
| AUC      | <i>0,560</i>    | 0,643         | 0,084          | 15%               |
| TPR      | <i>0,294</i>    | 0,441         | 0,147          | 50%               |
| MMCE     | <i>0,184</i>    | 0,244         | 0,061          | 33%               |
| GPR      | <i>0,088</i>    | 0,113         | 0,025          | 28%               |
| PPV      | <i>0,026</i>    | 0,029         | 0,002          | 9%                |
| NPV      | <i>0,986</i>    | 0,988         | 0,002          | 0%                |
| Log loss | <i>0,692</i>    | 0,663         | -0,030         | -4%               |

**Table S6. Performance for the machine learning algorithm with the count indicators for each candidate model with percent (%) difference to base model**

| Data type       | AUC<br>(Diff to base<br>model;ln %) | F-score<br>(Diff to base<br>model;ln %) | Kappa<br>(Diff to base<br>model;ln %) | PPV<br>(Diff to base<br>model;ln %) | TPR<br>(Diff to base<br>model;ln %) | Algorithm                  |
|-----------------|-------------------------------------|-----------------------------------------|---------------------------------------|-------------------------------------|-------------------------------------|----------------------------|
| Count Indicator | 0.639<br>(0.08;14.68%)              | 0.05<br>(0.003;6%)                      | 0.021<br>(0.002;10.3%)                | 0.026<br>(0.001;2.6%)               | 0.488<br>(0.2;69.2%)                | Logistic                   |
| Count Indicator | 0.645<br>(0.09;15.71%)              | 0.054<br>(0.006;13.4%)                  | 0.025<br>(0.006;30.3%)                | 0.029<br>(0.003;10.5%)              | 0.459<br>(0.171;59.2%)              | Elastic Net                |
| Count Indicator | 0.641<br>(0.08;15.04%)              | 0.051<br>(0.004;8.7%)                   | 0.022<br>(0.003;17.5%)                | 0.027<br>(0.001;5.5%)               | 0.474<br>(0.185;64.2%)              | Support Vector<br>Machines |
| Count Indicator | 0.643<br>(0.09;15.4%)               | 0.054<br>(0.007;14.2%)                  | 0.025<br>(0.006;32.7%)                | 0.029<br>(0.003;11.6%)              | 0.443<br>(0.155;53.7%)              | Gradient<br>Boosting       |
| Count Indicator | 0.642<br>(0.08;15.25%)              | 0.044<br>(-0.003;-7%)                   | 0.014<br>(-0.005;-25.6%)              | 0.023<br>(-0.003;-11.4%)            | 0.612<br>(0.324;112.2%)             | Random Forest              |
| Count Indicator | 0.634<br>(0.08;13.68%)              | 0.075<br>(0.027;57.6%)                  | 0.05<br>(0.031;160.5%)                | 0.045<br>(0.019;72.9%)              | 0.228<br>(-0.06;-20.9%)             | Neural Networks            |
| Count Indicator | 0.555<br>(0;-0.33%)                 | 0.037<br>(-0.01;-21.6%)                 | 0.007<br>(-0.012;-61.5%)              | 0.019<br>(-0.006;-24.6%)            | 0.407<br>(0.118;41%)                | K nearest<br>Neighbors     |
| Count Indicator | 0.648<br>(0.09;16.33%)              | 0.047<br>(-0.001;-1.1%)                 | 0.017<br>(-0.002;-9.8%)               | 0.024<br>(-0.001;-5.4%)             | 0.577<br>(0.289;100.1%)             | Stacked -<br>Average       |
| Count Indicator | 0.649<br>(0.09;16.39%)              | 0<br>(-0.047;-100%)                     | 0<br>(-0.019;-100%)                   | 1<br>(0.974;3774.1%)                | 0<br>(-0.289;-100%)                 | Stacked - CV               |
| Count Indicator | 0.637<br>(0.08;14.37%)              | 0.076<br>(0.029;60.8%)                  | 0.052<br>(0.033;171.2%)               | 0.046<br>(0.021;79.9%)              | 0.212<br>(-0.076;-26.5%)            | Stacked - Hill<br>climb    |



| <b>Category</b> | <b>Values</b>        |
|-----------------|----------------------|
| 1 (Lowest)      | $\leq 0.41$          |
| 2               | $0.41 < \leq 0.464$  |
| 3               | $0.464 < \leq 0.518$ |
| 4               | $0.518 < \leq 0.572$ |
| 5               | $0.572 < \leq 0.626$ |
| 6               | $0.626 < \leq 0.68$  |
| 7               | $0.68 < \leq 0.734$  |
| 8               | $0.734 < \leq 0.788$ |
| 9               | $0.788 < \leq 0.842$ |
| 1 (Highest)     | $\geq 0.842$         |

**Table S8. Adjusted\* Odds Ratios (OR) with with 95%CI for the FMRS based on all candidate indicators, the top 21 and the top 3, respectively**

|      |             | 353 candidate indicators |            |               | Top 21        |            |               | Top 3       |              |                   |
|------|-------------|--------------------------|------------|---------------|---------------|------------|---------------|-------------|--------------|-------------------|
|      |             | ASD cases                | OR         | 95%CI         | ASD cases (%) | OR         | 95%CI         | ASD cases   | OR           | 95%CI             |
| FMRS |             |                          |            |               |               | FMRS       |               |             |              |                   |
|      | 1 (Lowest)  | 1428 (0.8%)              | <i>ref</i> |               | 11010 (1.1%)  | <i>ref</i> |               | 1 (Lowest)  | 20145 (1.3%) | <i>ref</i>        |
|      | 2           | 10066 (1.1%)             | 1,12       | (1,06--1,18)  | 4459 (1.5%)   | 1,29       | (1,25-1,34)   | 2           | 2560 (2.7%)  | 2,00 (1,92-2,08)  |
|      | 3           | 4824 (1.6%)              | 1,58       | (1,49-1,68)   | 3509 (2.0%)   | 1,70       | (1,63-1,77)   | 3           | 1000 (3.2%)  | 2,21 (2,07-2,35)  |
|      | 4           | 3324 (2.1%)              | 2,05       | (1,92-219)    | 2201 (2.5%)   | 2,13       | (2,04-2,24)   | 4           | 1574 (7.5%)  | 5,21 (4,94-5,5)   |
|      | 5           | 2275 (2.9%)              | 2,82       | (2,64-3,02)   | 1354 (3.2%)   | 2,75       | (2,6-2,92)    | 5           | 1096 (11.3%) | 7,99 (7,48-8,53)  |
|      | 6           | 1193 (4.2%)              | 3,91       | (3,61-4,23)   | 721 (4%)      | 3,28       | (3,04-3,55)   | 6 (Highest) | 143 (13.7%)  | 9,63 (8,04-11,55) |
|      | 7           | 583 (5.7%)               | 5,19       | (4,7-5,74)    | 482 (5%)      | 4,02       | (3,66-4,42)   |             |              |                   |
|      | 8           | 811 (6.8%)               | 6,39       | (5,84-6,99)   | 1071 (7.5%)   | 6,19       | (5,8-6,61)    |             |              |                   |
|      | 9           | 1317 (10.1%)             | 9,49       | (8,77-10,27)  | 1180 (10.4%)  | 8,70       | (8,15-9,28)   |             |              |                   |
|      | 1 (Highest) | 697 (15.7%)              | 15,52      | (14,06-17,14) | 531 (15.3%)   | 13,52      | (12,27-14,89) |             |              |                   |

| <b>Table S9. Adjusted* Odds Ratios (OR) with 95%CI for the FMRS restricting the study population to i) only children, ii) complete linkages, iii) incomplete linkages, iv) test subsample</b> |              |               |       |              |              |                                                                                         |       |             |                  |                     |             |                    |       |                 |  |
|-----------------------------------------------------------------------------------------------------------------------------------------------------------------------------------------------|--------------|---------------|-------|--------------|--------------|-----------------------------------------------------------------------------------------|-------|-------------|------------------|---------------------|-------------|--------------------|-------|-----------------|--|
|                                                                                                                                                                                               |              | Only children |       |              |              | Complete linkages                                                                       |       |             |                  | Incomplete linkages |             |                    |       | Test sub sample |  |
|                                                                                                                                                                                               |              | (%)           | OR    | 95%CI        | (%)          | OR                                                                                      | 95%CI | (%)         | OR               | 95%CI               | (%)         | OR                 | 95%CI |                 |  |
| FMRS                                                                                                                                                                                          |              |               |       |              |              |                                                                                         |       |             |                  |                     |             |                    |       |                 |  |
|                                                                                                                                                                                               | 1 (Lowest)   |               | **    | -            | 49 (0.7%)    | <i>ref</i>                                                                              |       | 39 (0.5%)   | <i>ref</i>       |                     | 16 (0.58%)  | <i>ref</i>         |       |                 |  |
|                                                                                                                                                                                               | 2            | 2341 (1.7%)   |       | <i>ref</i>   | 6983 (1.0%)  | 0,89 (0,67-1,18)                                                                        |       | 3563 (1.2%) | 1,19 (0,86-1,64) |                     | 2126 (1.1%) | 1,07 (0,65-1,75)   |       |                 |  |
|                                                                                                                                                                                               | 3            | 1480 (2.4%)   | 1,25  | (1,17-1,33)  | 3588 (1.4%)  | 1,20 (0,9-1,59)                                                                         |       | 1922 (1.9%) | 1,55 (1,12-2,13) |                     | 1106 (1.5%) | 1,44 (0,87-2,37)   |       |                 |  |
|                                                                                                                                                                                               | 4            | 1026 (2.8%)   | 1,53  | (1,43-1,66)  | 2267 (1.9%)  | 1,65 (1,24-2,19)                                                                        |       | 1249 (2.5%) | 1,97 (1,43-2,73) |                     | 708 (2.1%)  | 1,96 (1,19-3,23)   |       |                 |  |
|                                                                                                                                                                                               | 5            | 793 (3.5%)    | 1,97  | (1,82-2,15)  | 1473 (2.5%)  | 2,17 (1,63-2,9)                                                                         |       | 971 (3.3%)  | 2,55 (1,84-3,53) |                     | 504 (2.8%)  | 2,64 (1,59-4,36)   |       |                 |  |
|                                                                                                                                                                                               | 6            | 382 (4.3%)    | 2,28  | (2,04-2,56)  | 726 (3.4%)   | 2,89 (2,19-3,87)                                                                        |       | 472 (4.2%)  | 3,02 (2,17-4,21) |                     | 227 (3.4%)  | 3,14 (1,88-5,25)   |       |                 |  |
|                                                                                                                                                                                               | 7            | 121 (5.2%)    | 2,75  | (2,27-3,33)  | 497 (5.1%)   | 4,17 (3,1-5,61)                                                                         |       | 160 (4.8%)  | 3,38 (2,36-4,83) |                     | 125 (4.6%)  | 3,98 (2,34-6,74)   |       |                 |  |
|                                                                                                                                                                                               | 8            | 48 (7.6%)     | 3,89  | (2,87-5,28)  | 746 (6.9%)   | 5,81 (4,33-7,78)                                                                        |       | 154 (7.6%)  | 6,11 (4,27-8,78) |                     | 176 (6.6%)  | 5,83 (3,47-9,79)   |       |                 |  |
|                                                                                                                                                                                               | 9            | 9 (34.6%)     | 28,49 | (12,13-66,9) | 1320 (10.5%) | 9,08 (6,81-12,1)                                                                        |       | 159 (10.4%) | 8,46 (5,9-12,14) |                     | 308 (10.1%) | 10,06 (6,04-16,75) |       |                 |  |
|                                                                                                                                                                                               | 10 (Highest) |               | **    | -            | 466 (17.5%)  | 16,17 (11,97-21,8)                                                                      |       | 36 (12%)    | 9,16 (5,67-14,8) |                     | 96 (17.0%)  | 16,69 (9,68-28,79) |       |                 |  |
|                                                                                                                                                                                               |              |               |       |              |              | *Adjusted for sex, birth weight, gestational age, birth year, maternal and paternal age |       |             |                  |                     |             |                    |       |                 |  |
|                                                                                                                                                                                               |              |               |       |              |              | ** Not enough cases to estimate                                                         |       |             |                  |                     |             |                    |       |                 |  |

**Table S10. Adjusted Odds Ratios (OR) with with 95%CI for the FMRS additionally adjusting for the number of aunts and uncles, cousins, siblings and grandparents**

|                                                                                                                                          |              | OR*        | 95%CI         |
|------------------------------------------------------------------------------------------------------------------------------------------|--------------|------------|---------------|
| FMRS                                                                                                                                     |              |            |               |
|                                                                                                                                          | 1 (Lowest)   | <i>ref</i> | -             |
|                                                                                                                                          | 2            | 1,29       | (1,25-1,34)   |
|                                                                                                                                          | 3            | 1,70       | (1,63-1,77)   |
|                                                                                                                                          | 4            | 2,13       | (2,04-2,24)   |
|                                                                                                                                          | 5            | 2,75       | (2,6-2,92)    |
|                                                                                                                                          | 6            | 3,28       | (3,04-3,55)   |
|                                                                                                                                          | 7            | 4,02       | (3,66-4,42)   |
|                                                                                                                                          | 8            | 6,19       | (5,8-6,61)    |
|                                                                                                                                          | 9            | 8,70       | (8,15-9,28)   |
|                                                                                                                                          | 10 (Highest) | 13,52      | (12,27-14,89) |
| *also adjusted for gender, birth weight, gestational age, birth year, maternal, paternal age and highest parental educational attainment |              |            |               |

**Figure S1. Illustration of linkages to family members**

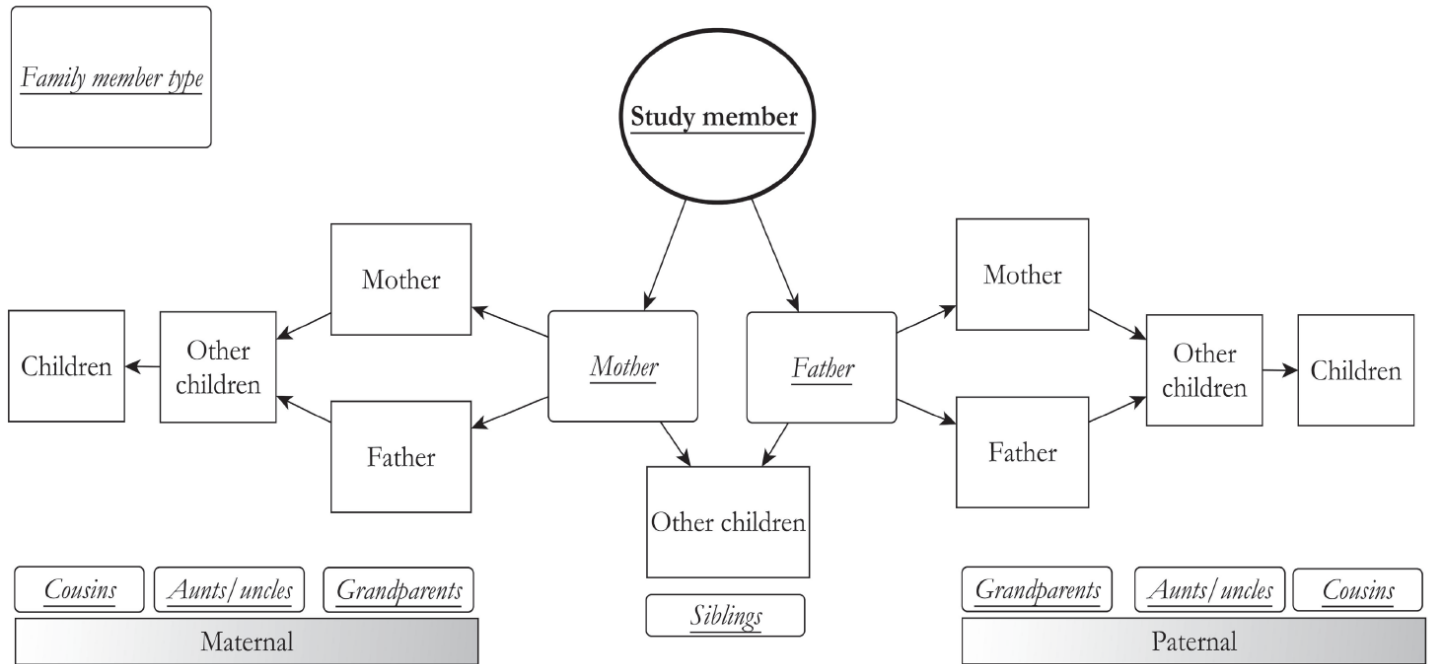

**Figure S2. Prevalence and percent (%) for each morbidity indicator**

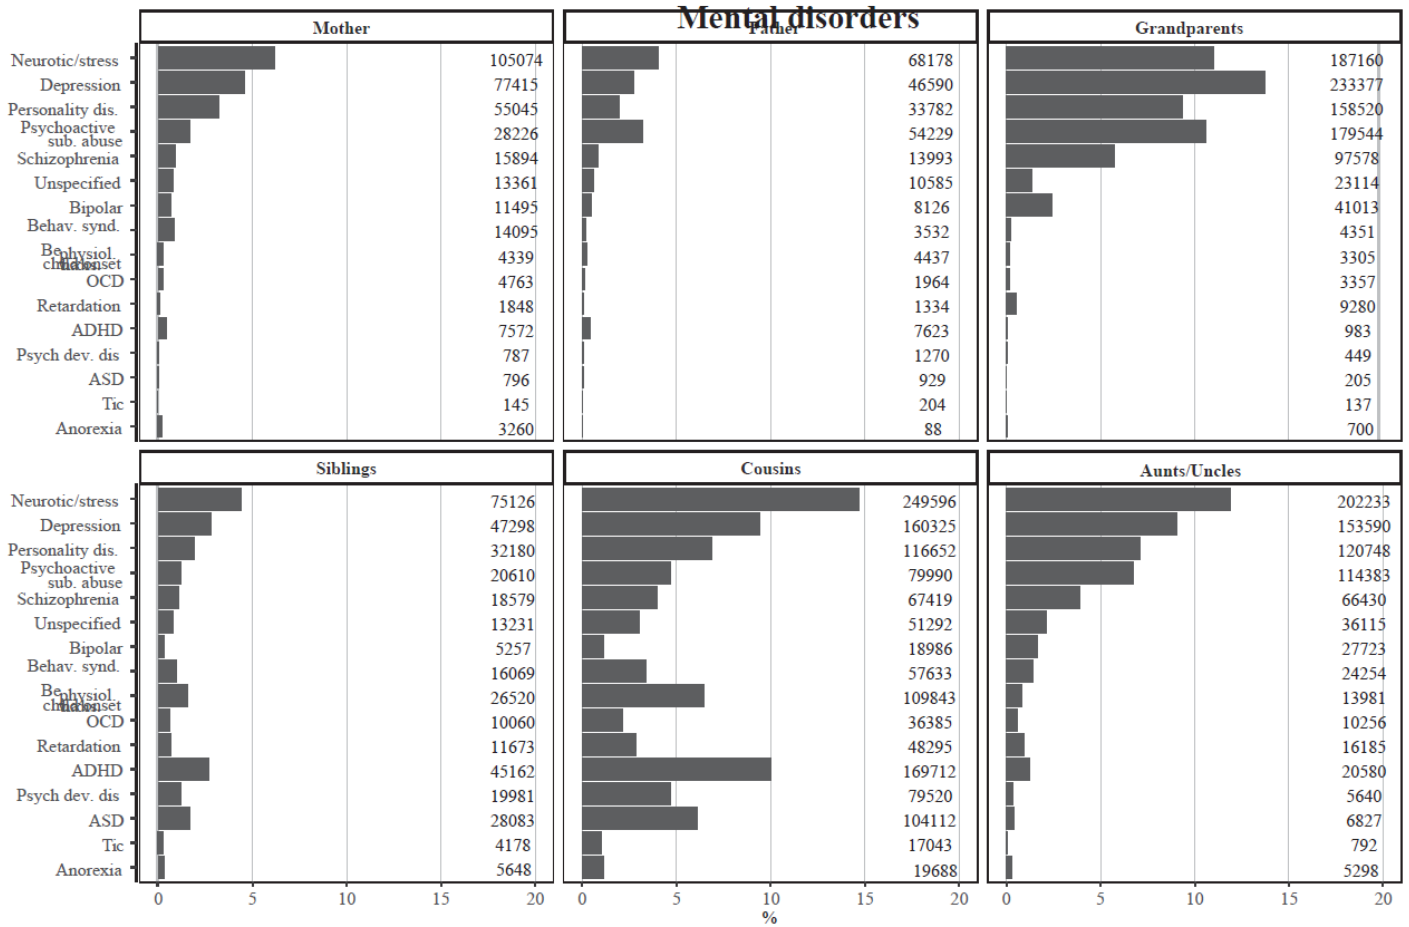

**Figure S2. Prevalence and percent (%) for each morbidity indicator, continued**

**Neurologic disorders**

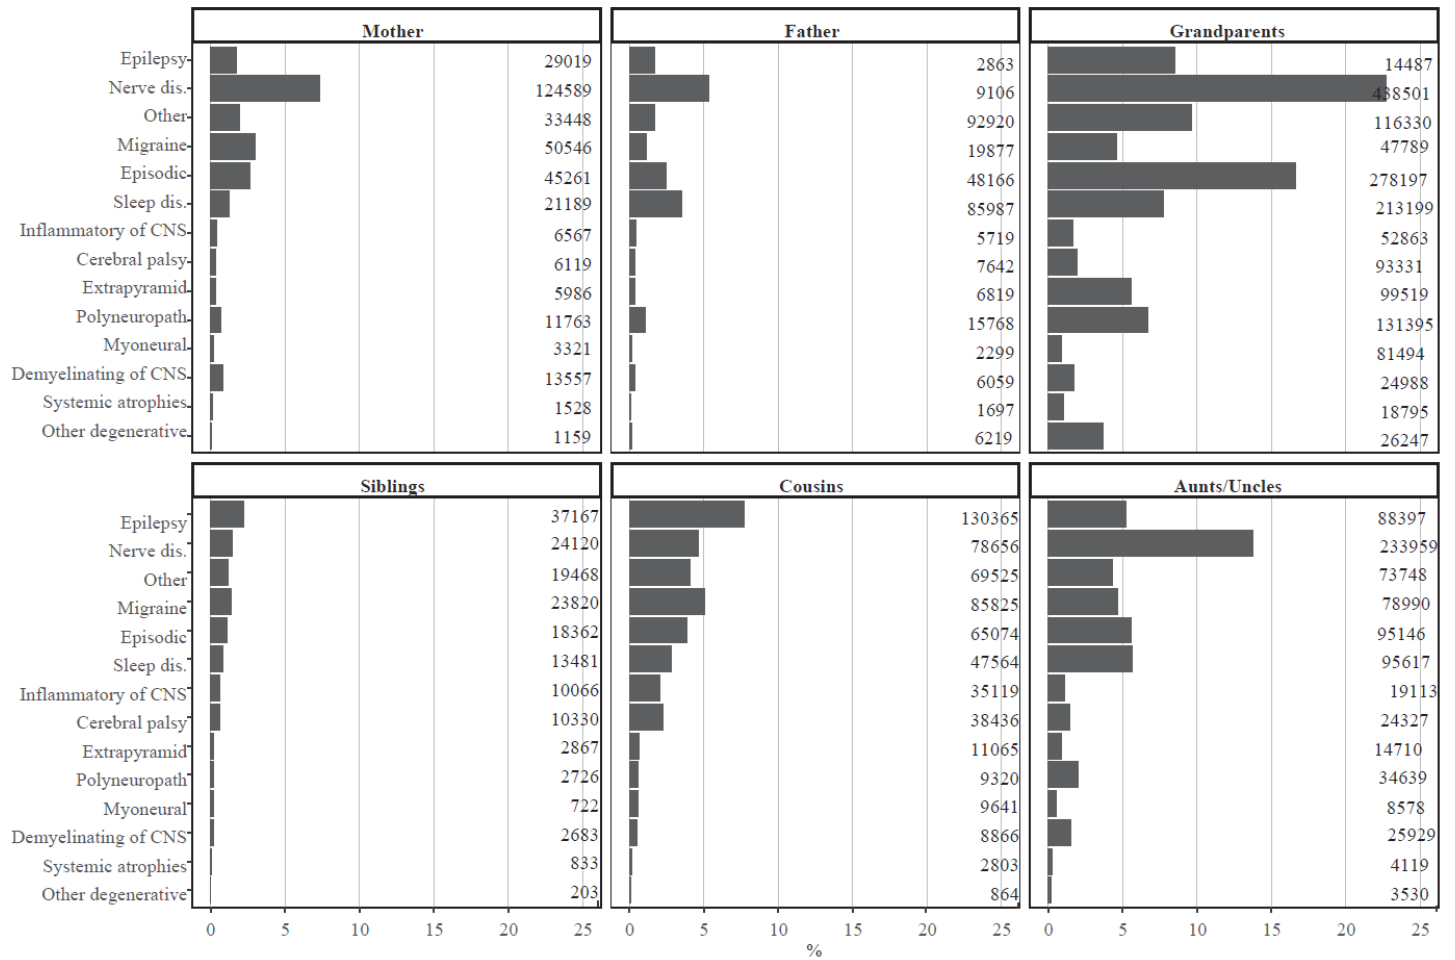

**Figure S2. Prevalence and percent (%) for each morbidity indicator, continued**

**Congenital defect disorders**

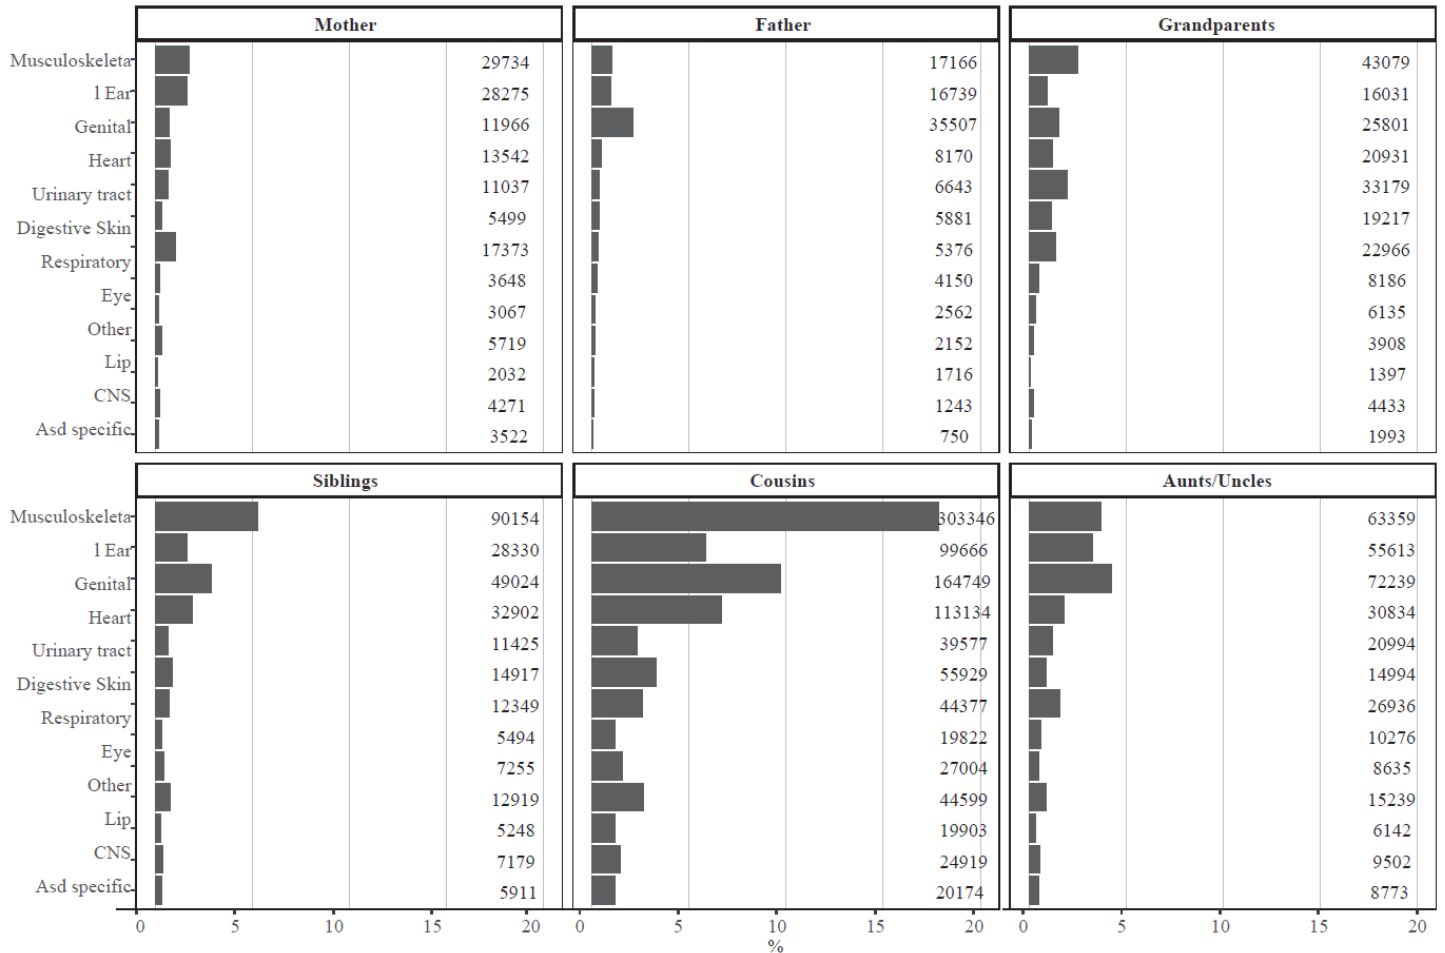



Figure S2. Prevalence and percent (%) for each morbidity indicator, continued

Autoimmune disorders

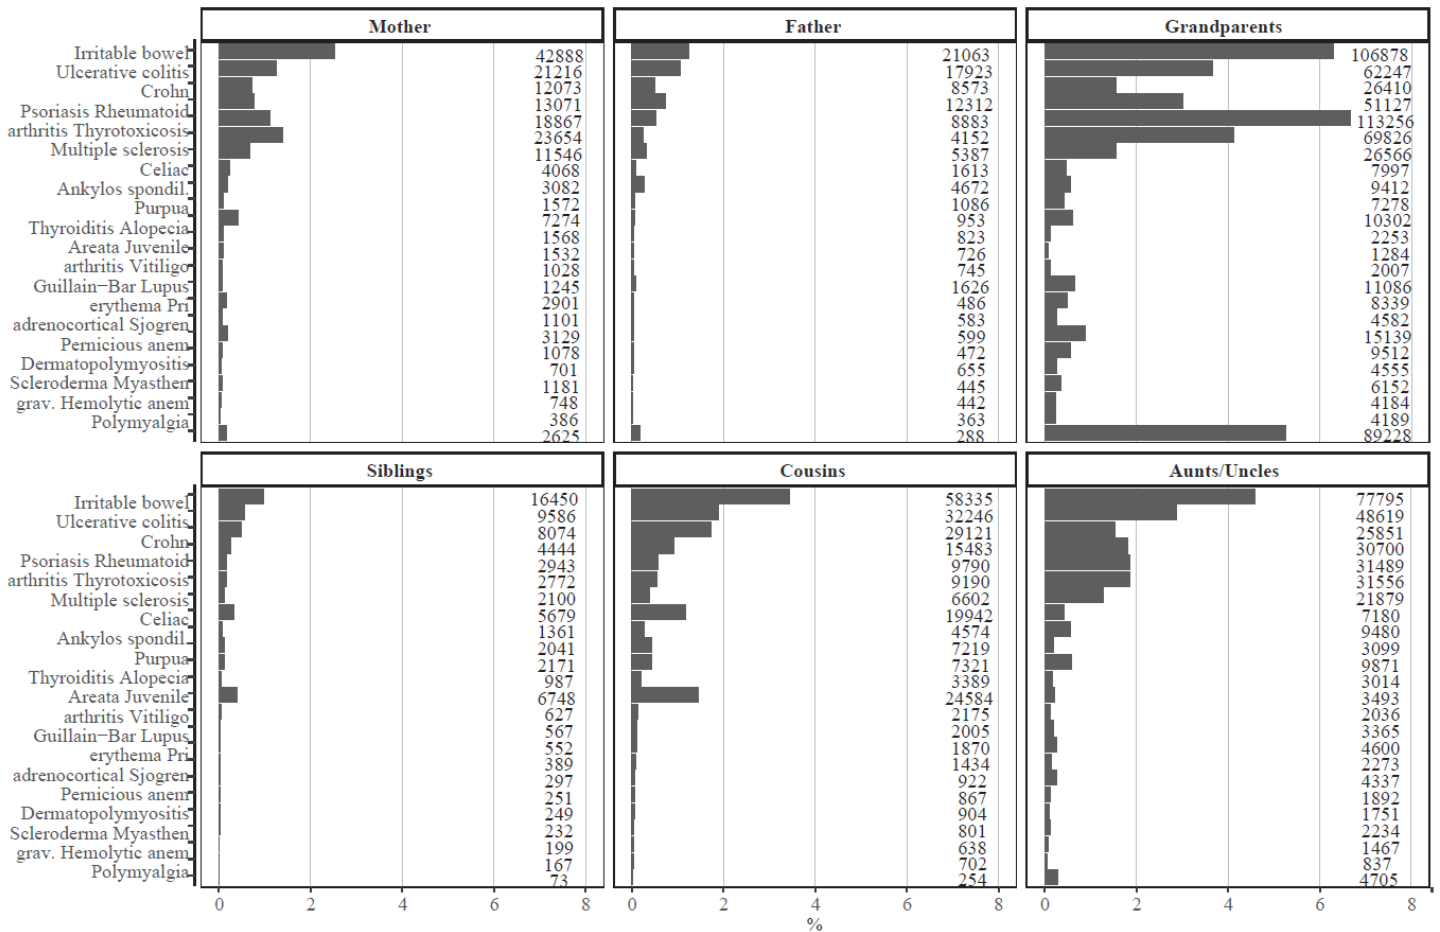

Figure S2. Prevalence and percent (%) for each morbidity indicator, continued

Cardiometabolic and other disorders

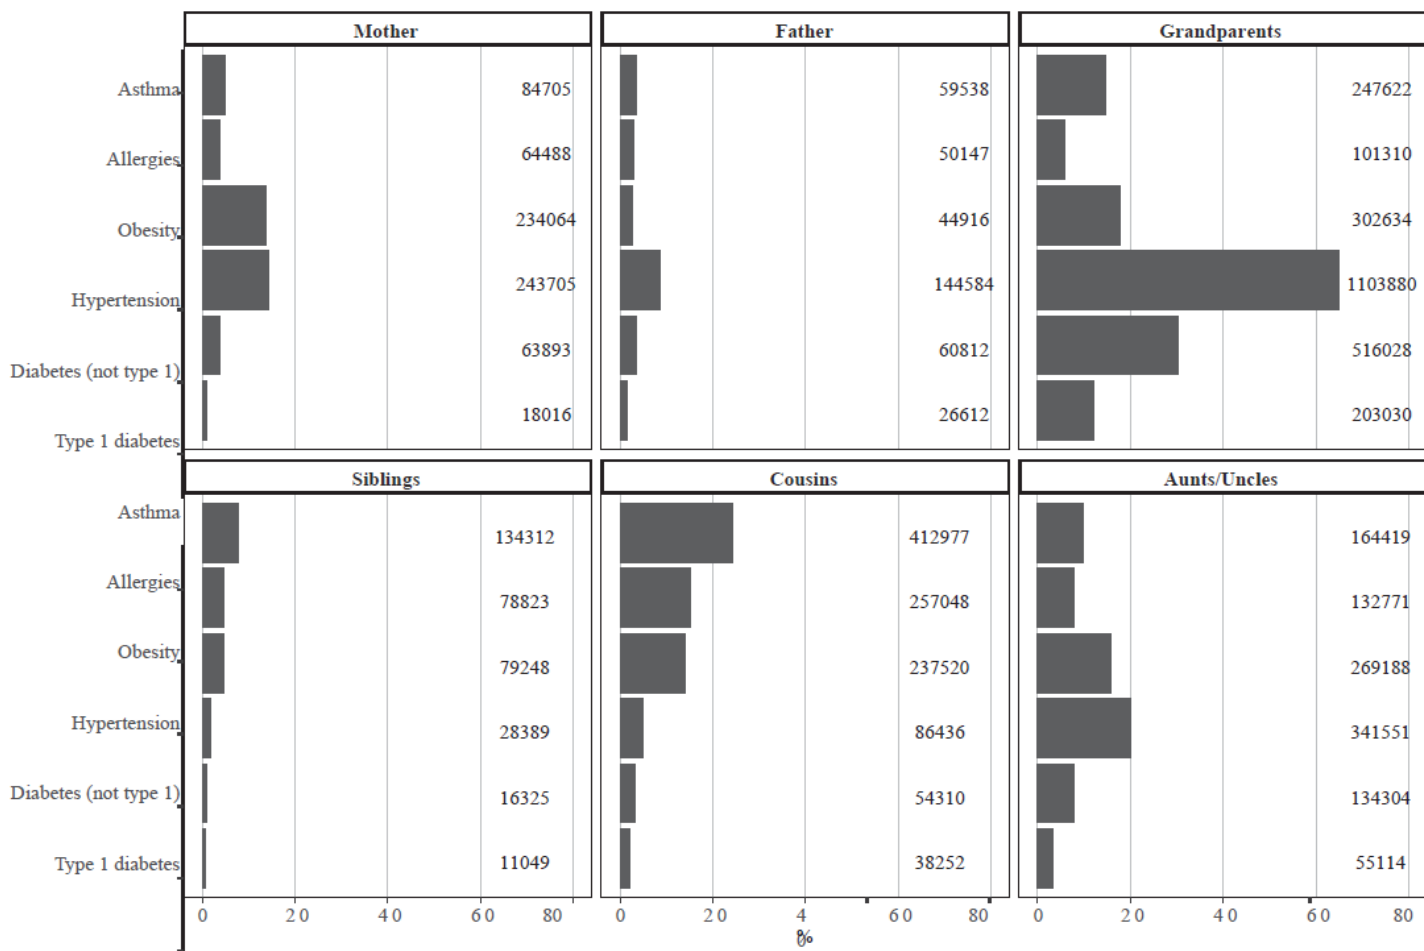

Figure S3. Percent (%) for each morbidity indicator by ASD/no ASD

Mental disorders

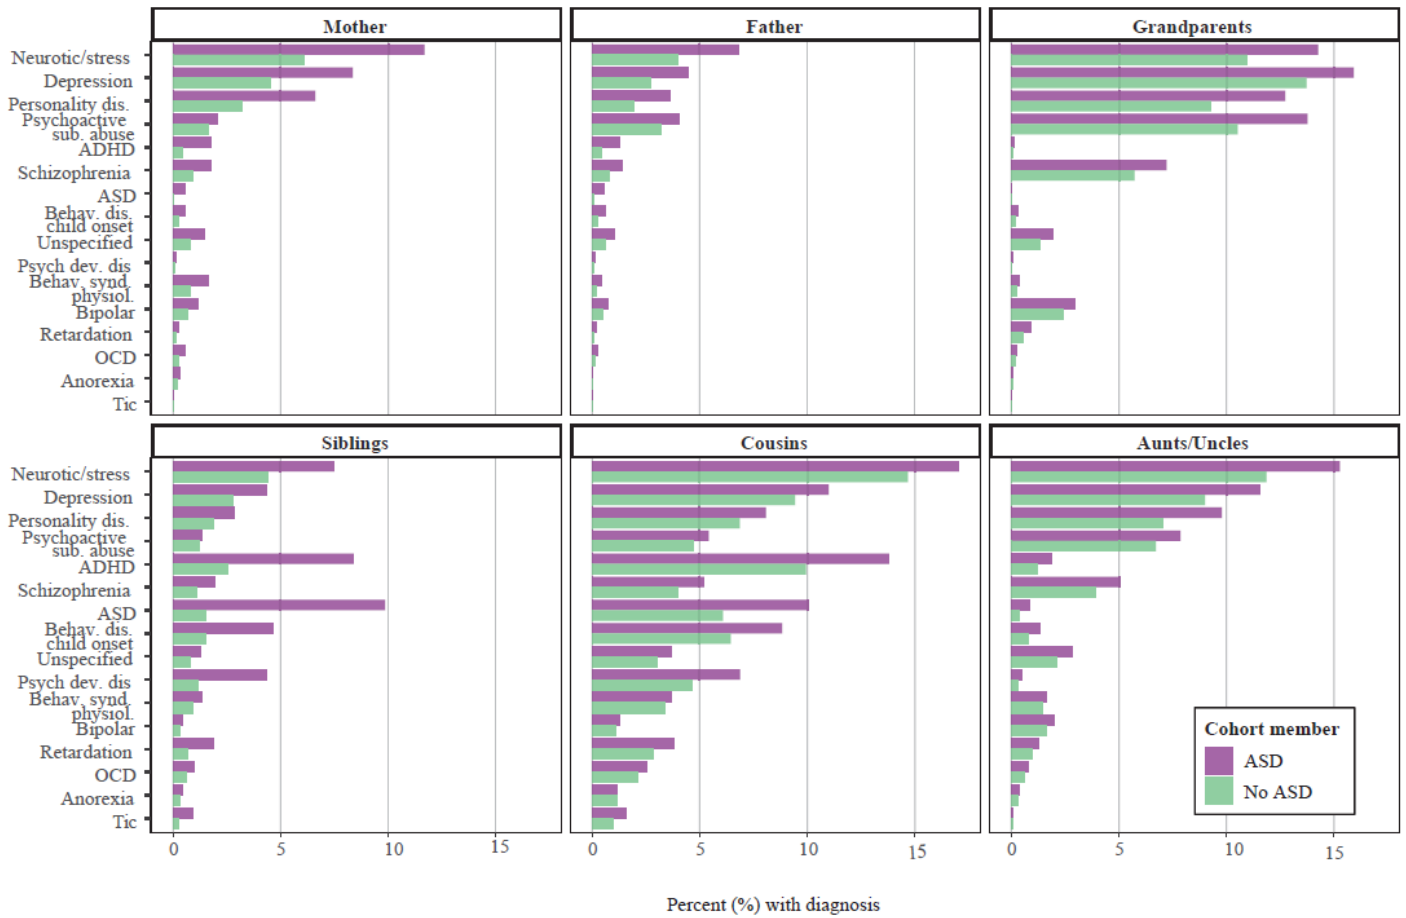

If there is below 5 cases then the bar is removed

Figure S3. Percent (%) for each morbidity indicator by ASD/no ASD, continued

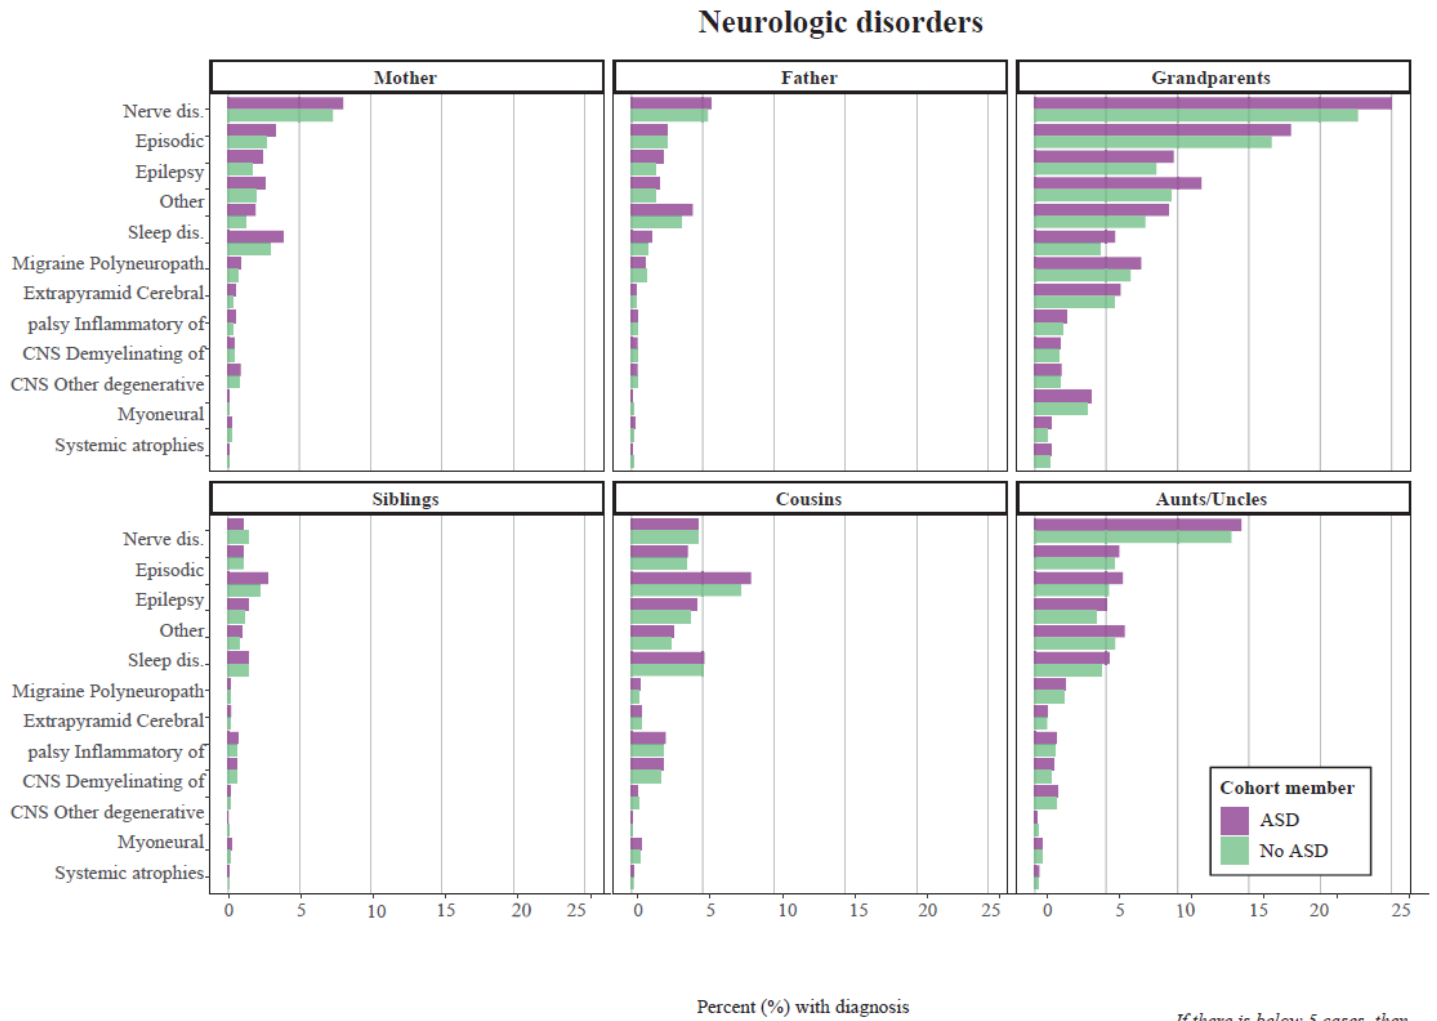

Figure S3. Percent (%) for each morbidity indicator by ASD/no ASD, continued

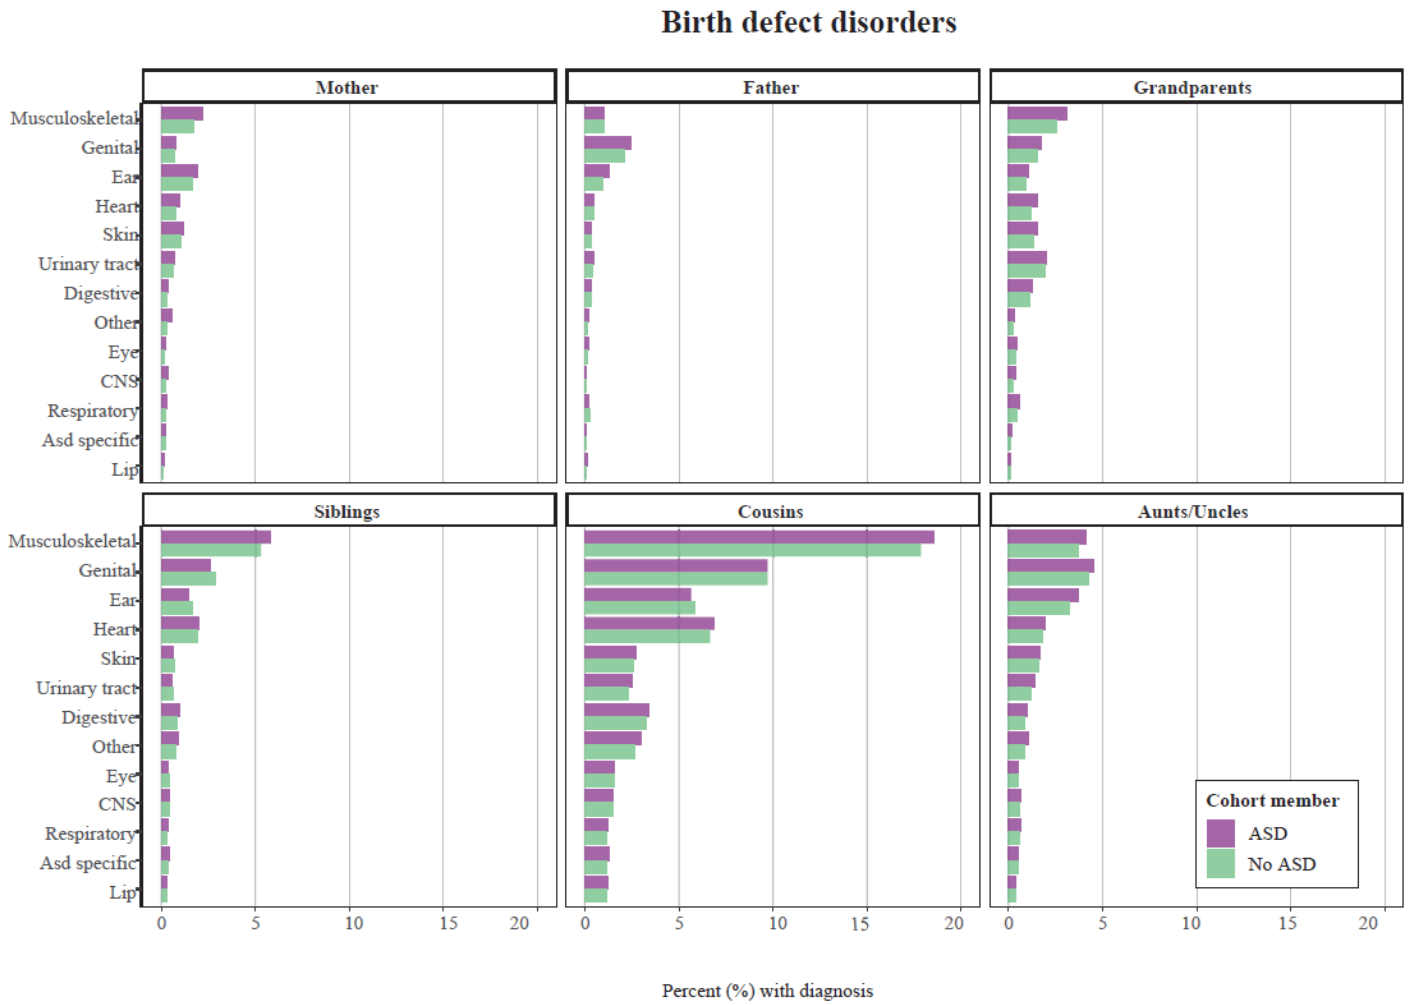

*If there is below 5 cases then the bar is removed*

Figure S3. Percent (%) for each morbidity indicator by ASD/no ASD, continued

Autoimmune disorders

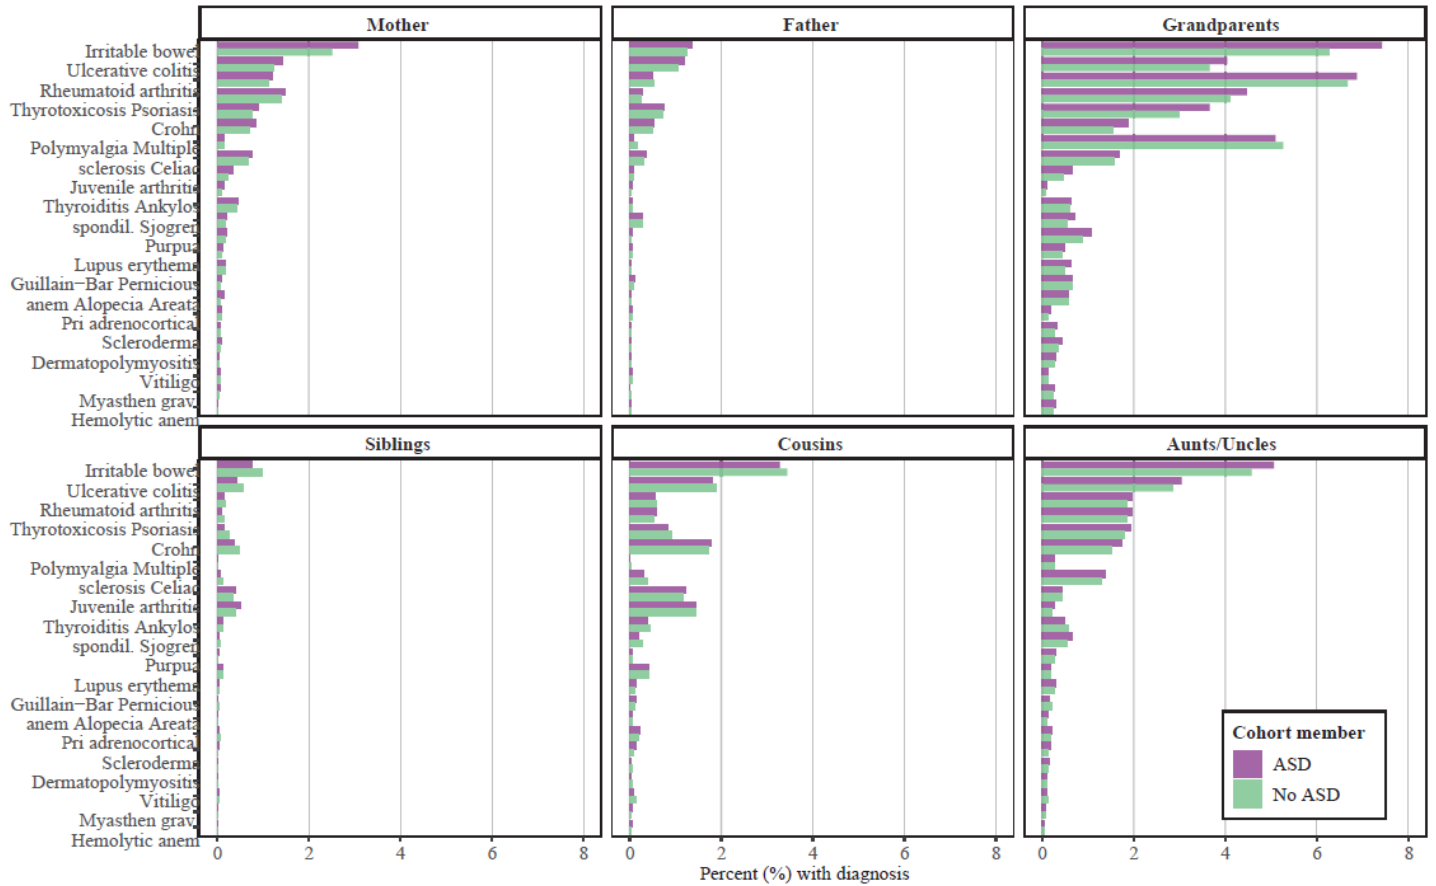

If there is below 5 cases then the bar is removed

Figure S3. Percent (%) for each morbidity indicator by ASD/no ASD, continued

Cardiometabolic and other disorders

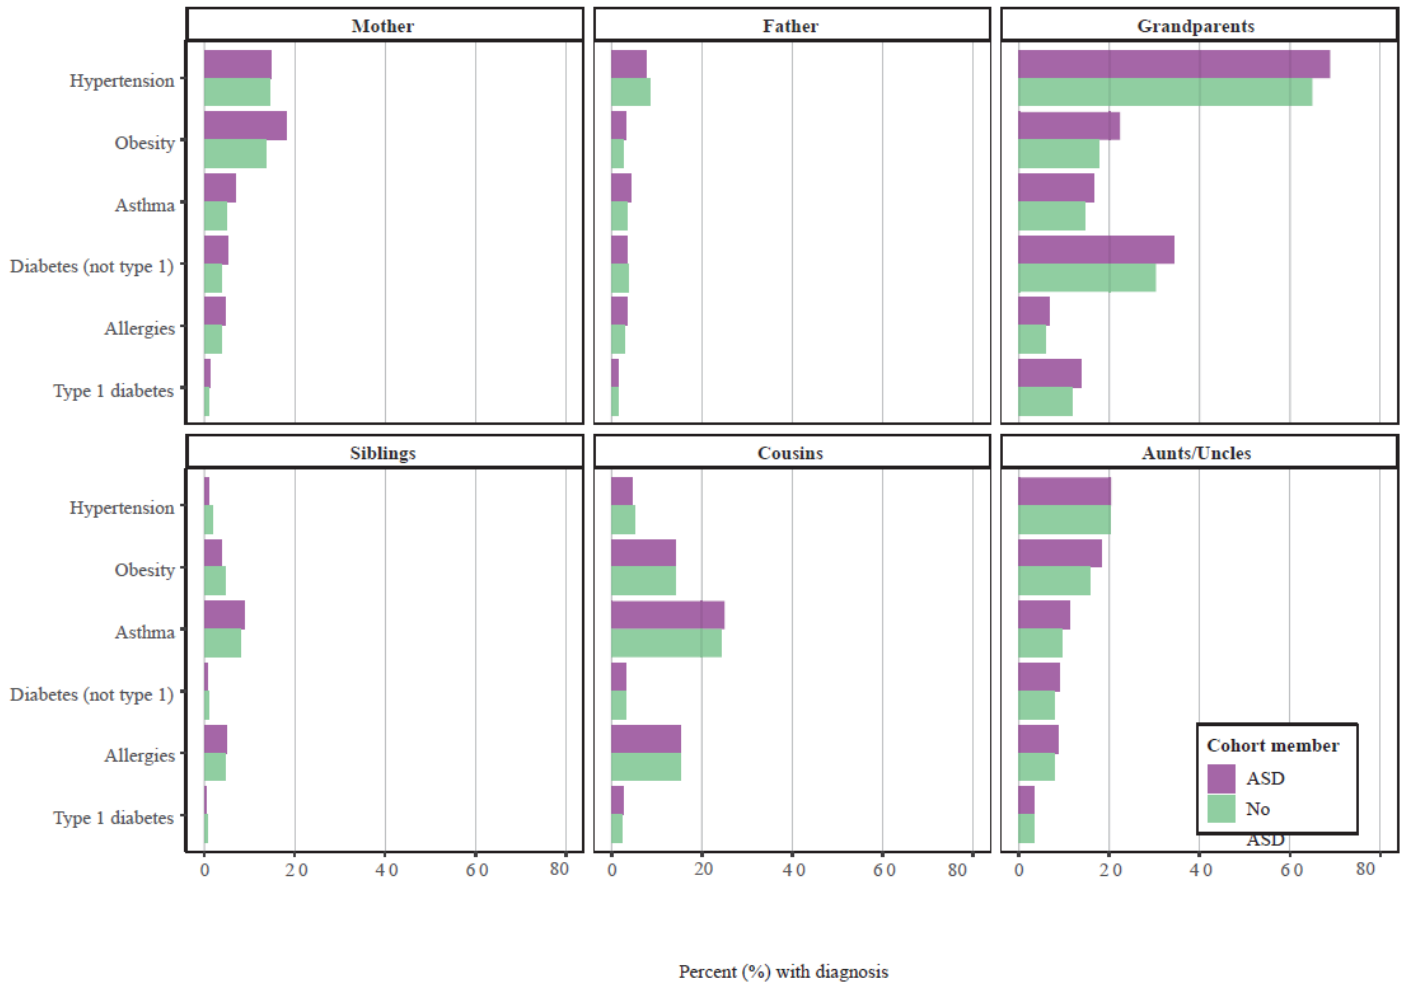

*If there is below 5 cases then the bar is removed*

Figure S4. Importance ranking of 30 most important predictors by Random Forest (A) and Extreme Gradient Boost (B)

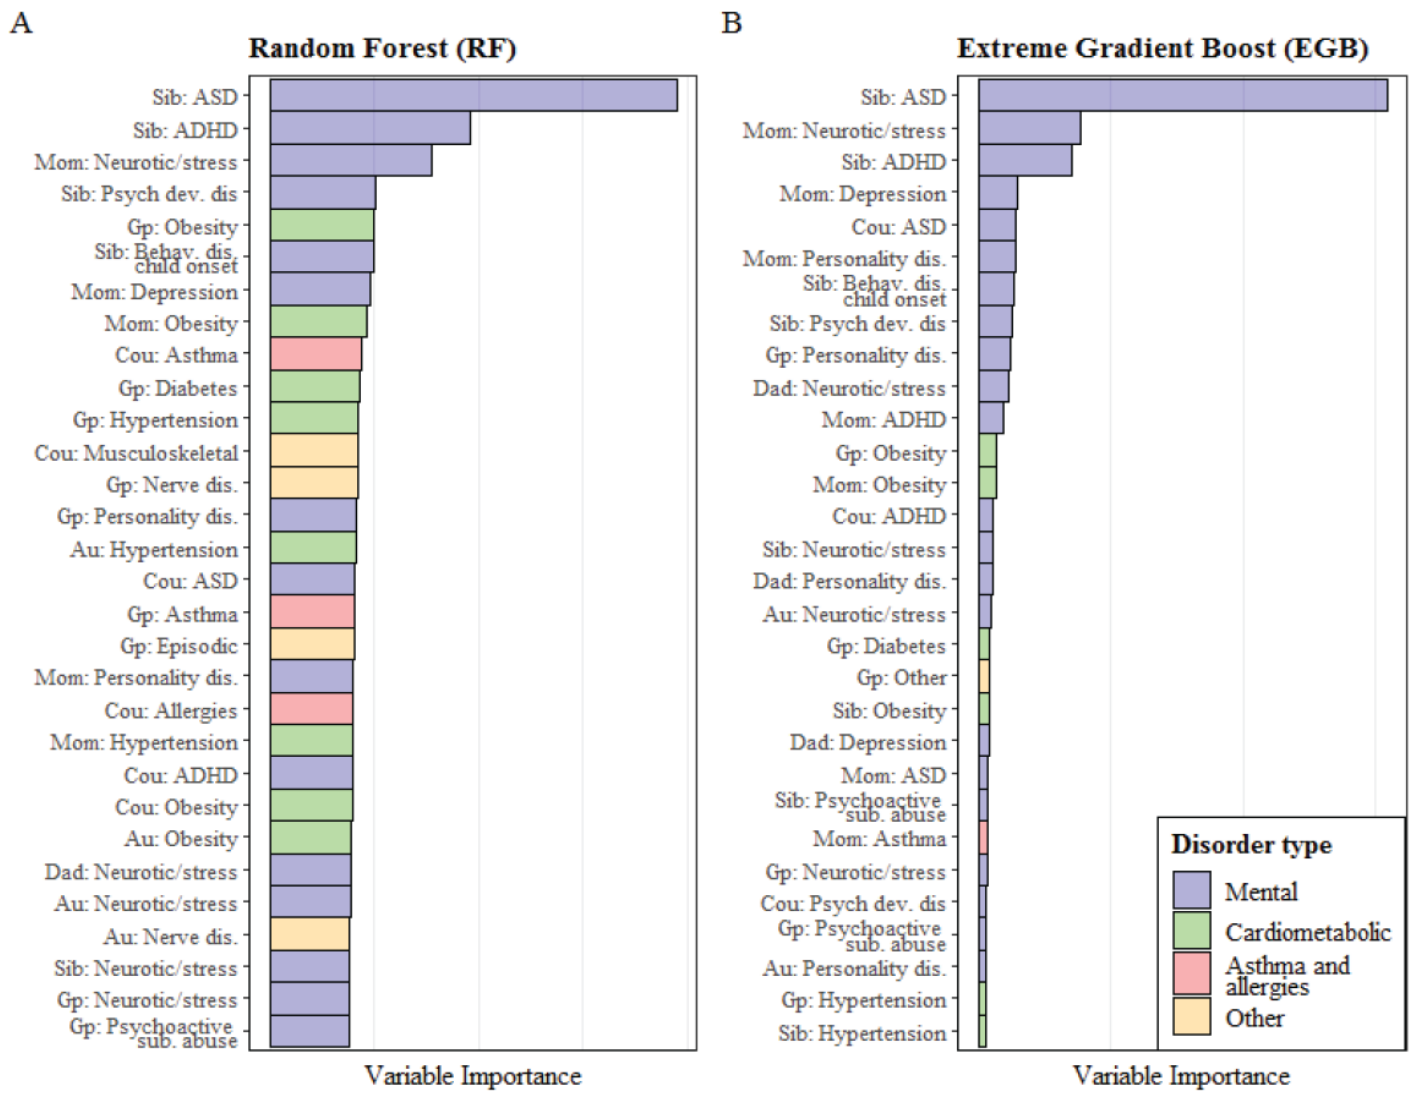



Figure S5. Illustration of performance measures on area-under-the-curve (AUC), F-score and Kappa for all morbidity indicators, top 41, top 21, top 3, respectively

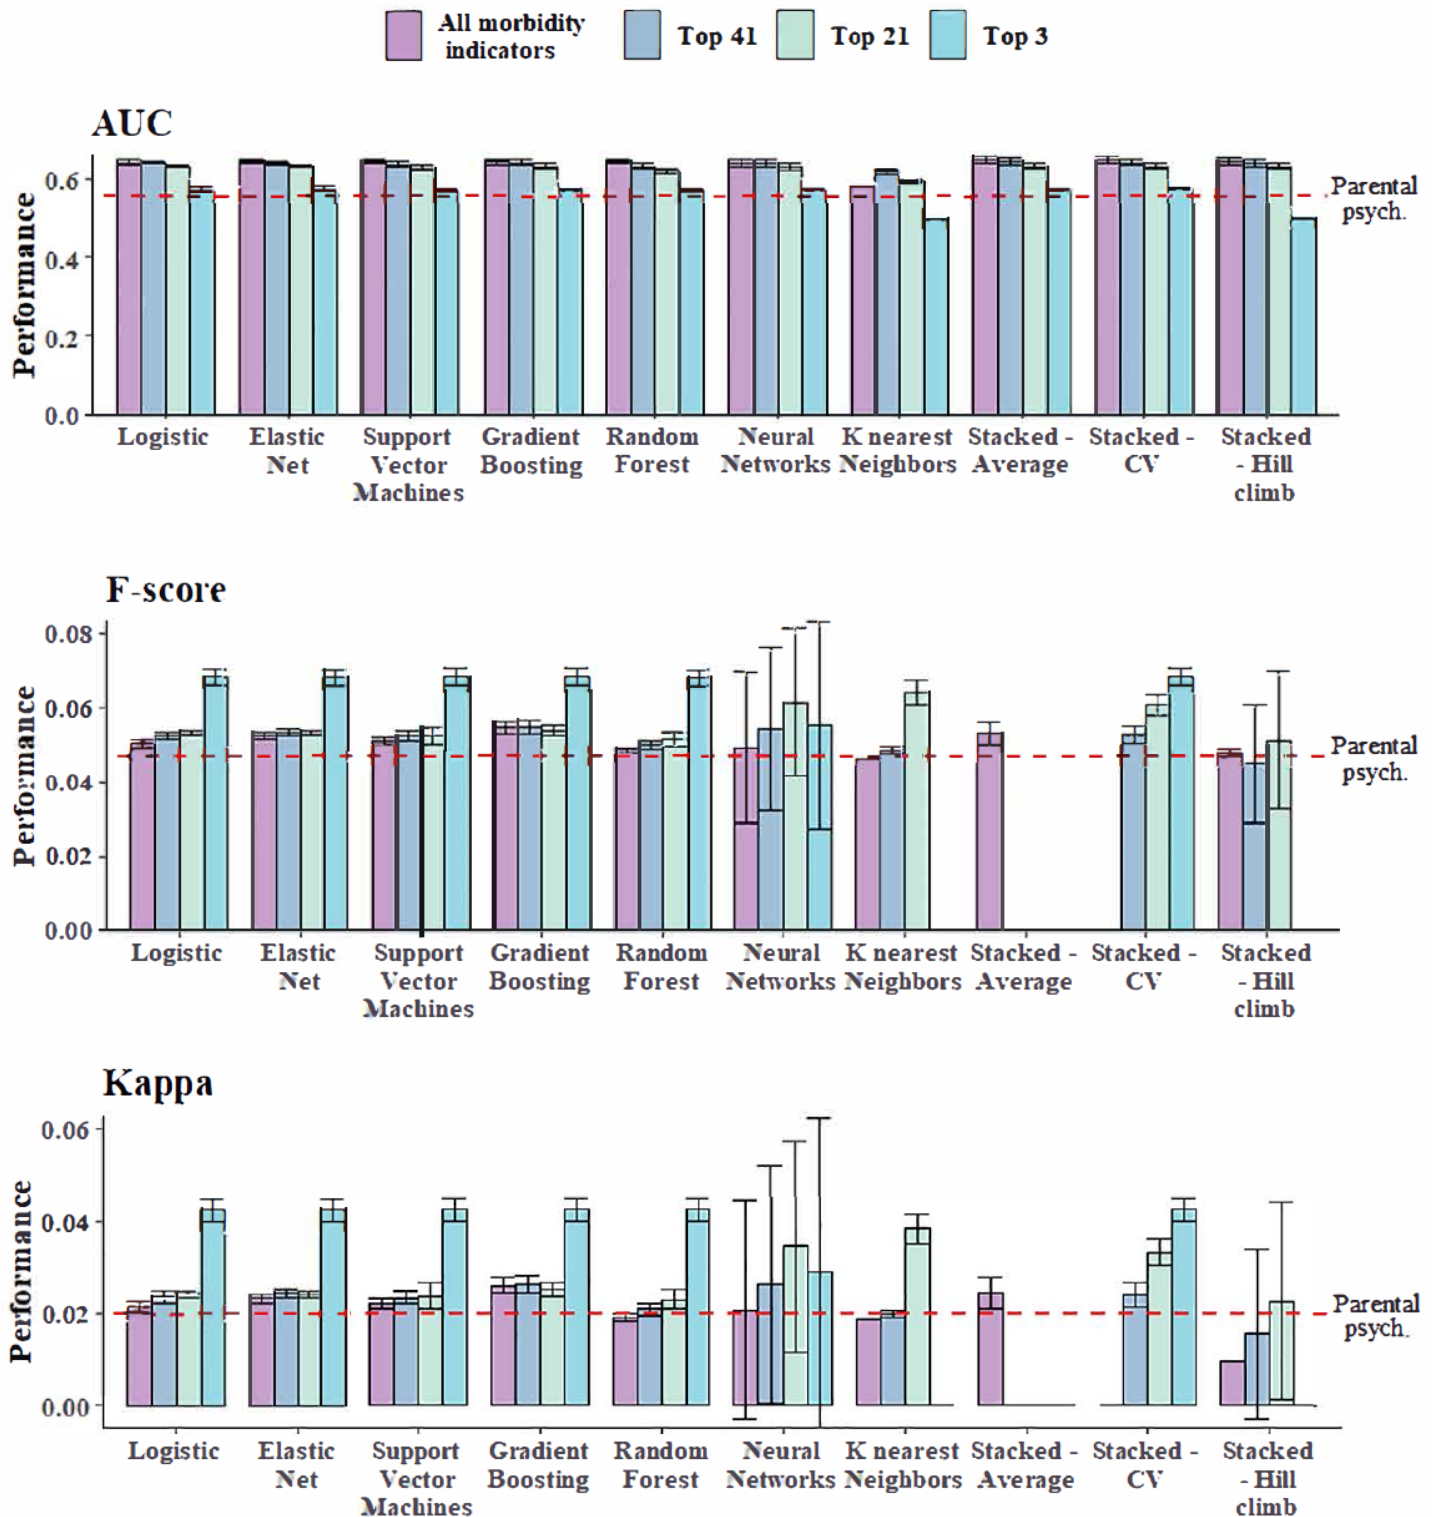

**Figure S6. Importance ranking of 30 most important predictors by Random Forest and Extreme Gradient Boost depending on sex of the cohort member**

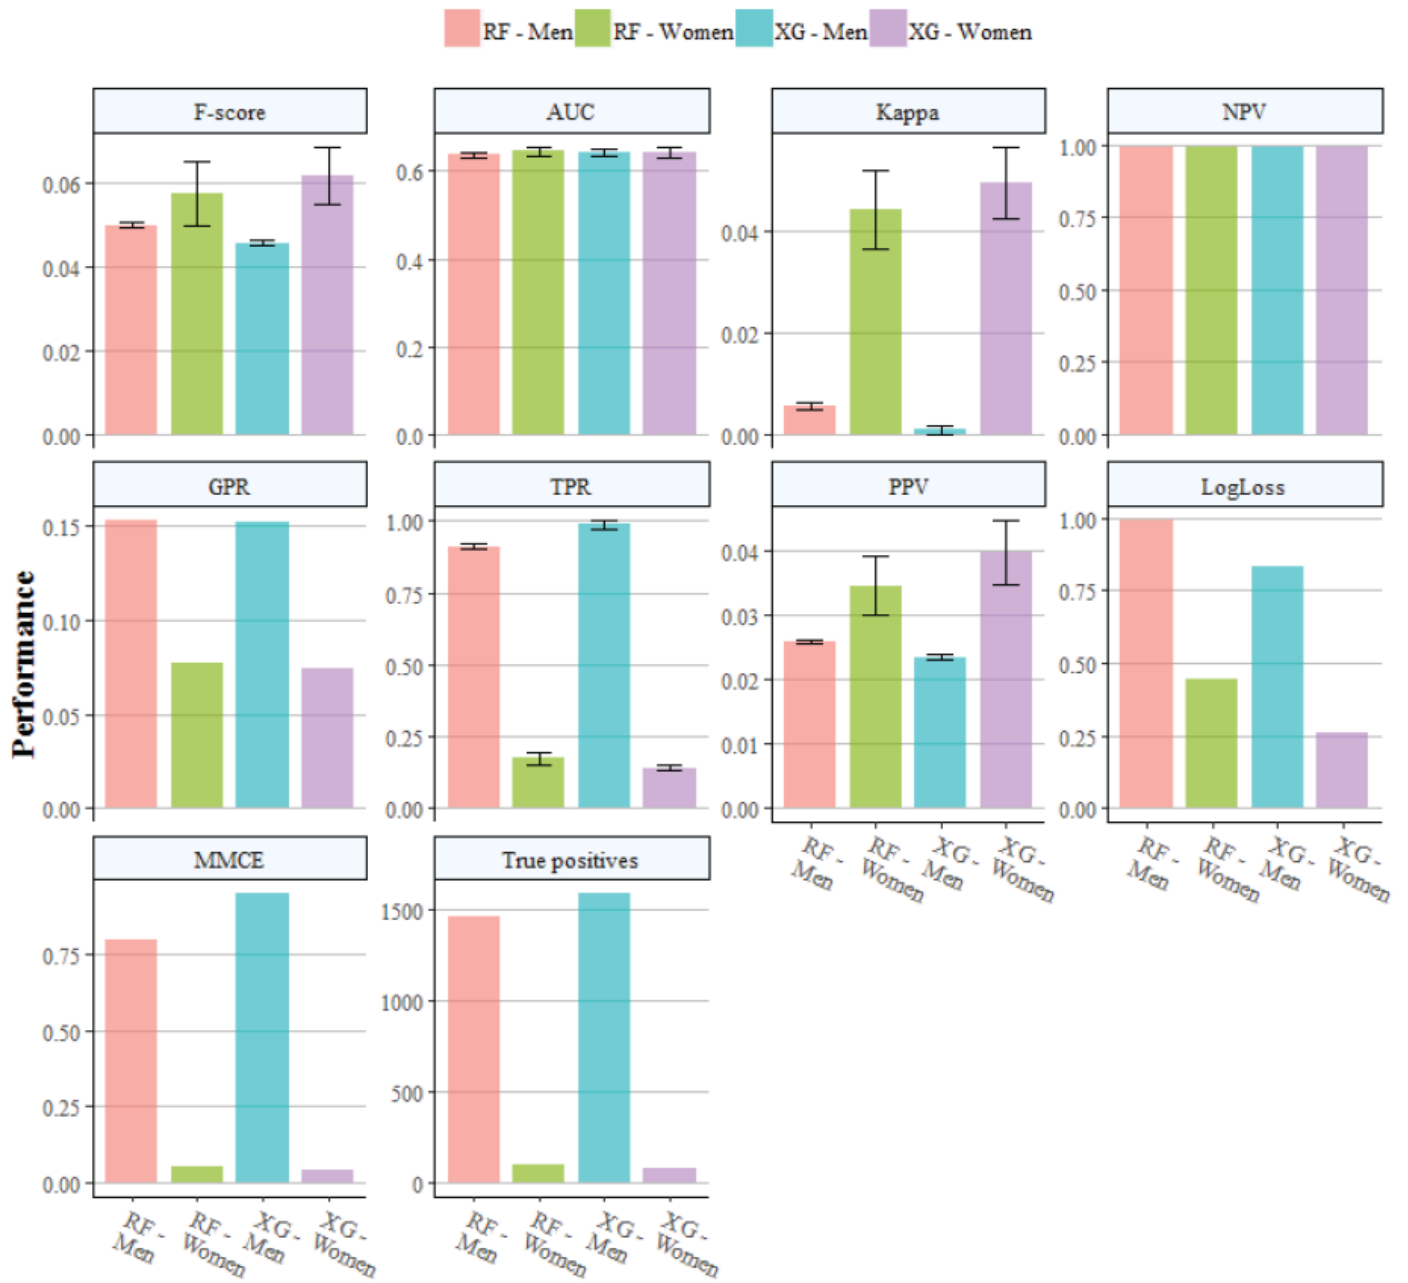

**Figure S7. Importance ranking of 30 most important predictors by Random Forest (bottom) and Extreme Gradient Boost (top) for men (A and C) and women (B and D), respectively**

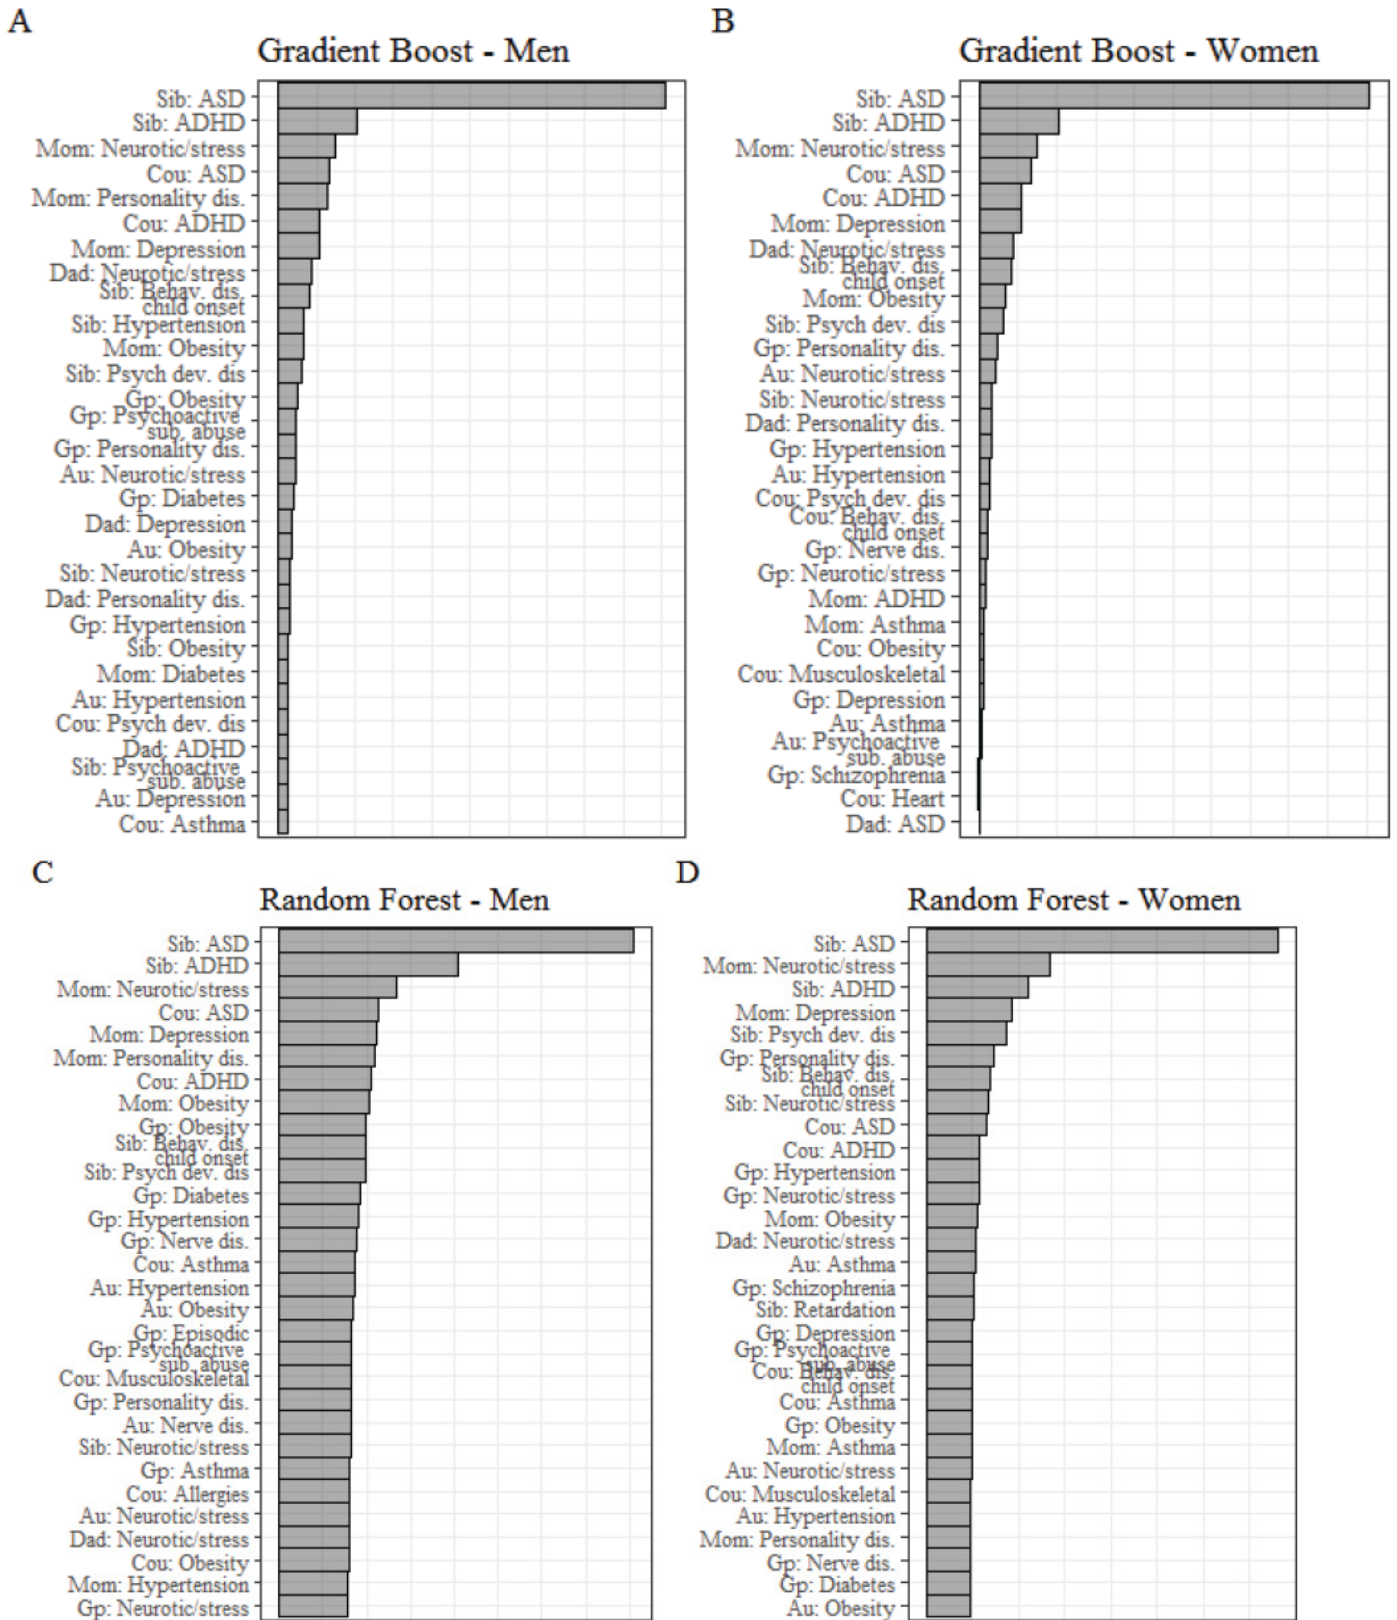

**Figure S8**

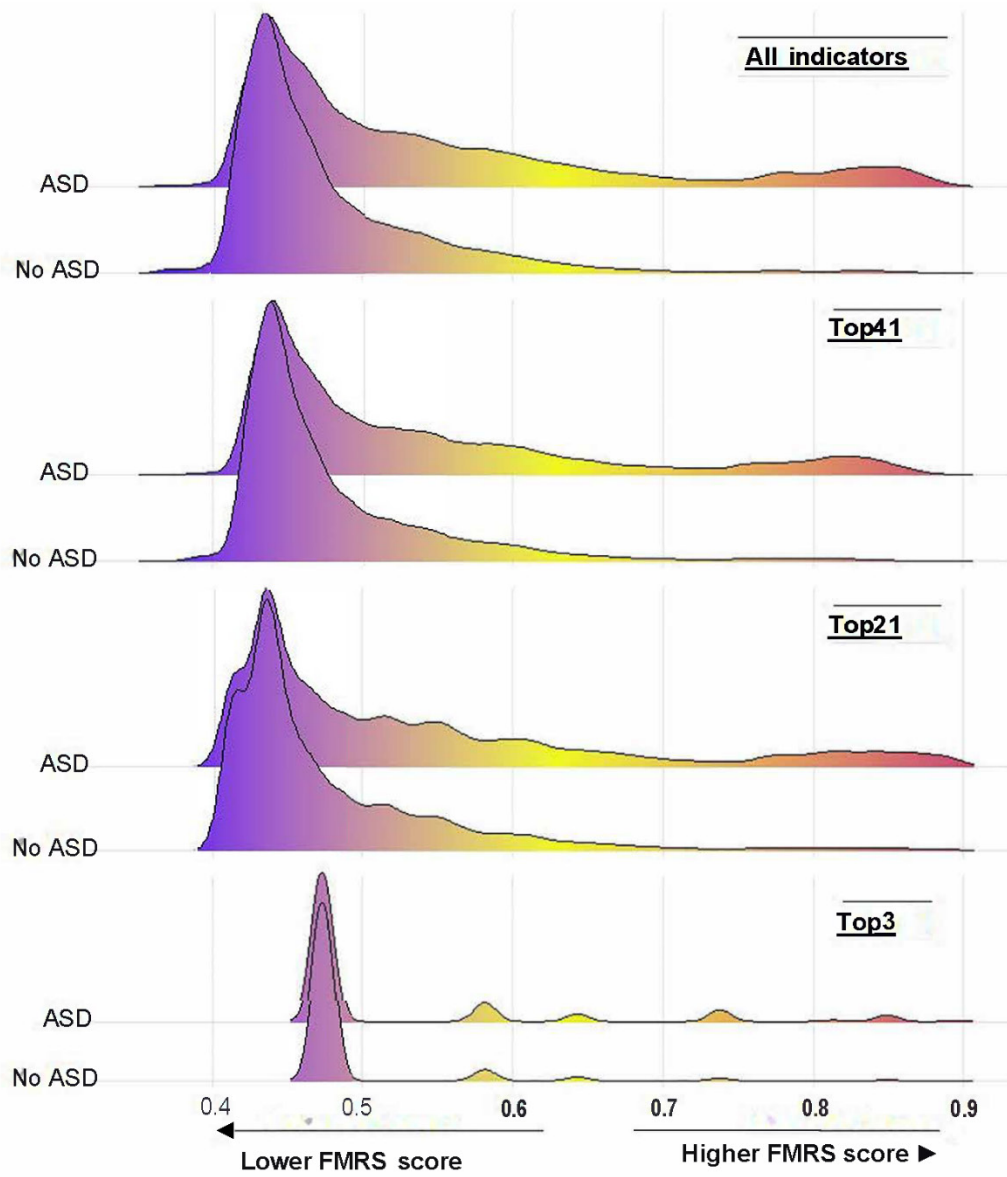

Supplement: mmc1.pdf [file mmc1.pdf]
